1 **TITLE:** Selection at the pathway level drives the evolution of gene-specific transcriptional noise

2

3 **AUTHORS:** Gustavo Valadares Barroso<sup>1</sup>; Natasa Puzovic<sup>1</sup> and Julien Y Dutheil<sup>1,2</sup>

4

5 **Affiliations:**

6 1) Max Planck Institute for Evolutionary Biology. Department of Evolutionary Genetics. August-

7 Thienemann-Straße 2 24306 Plön – GERMANY

8 2) ISEM – Institut des Sciences de l'Évolution. UMR 5554, Université de Montpellier, Place

9 Eugène Bataillon 34095 Montpellier cedex 05 – FRANCE

10

11 **Corresponding Author:**

12 Gustavo V. Barroso, Max Planck Institute for Evolutionary Biology. Department of Evolutionary

13 Genetics. August-Thienemann-Straße 2, 24306 Plön – GERMANY.

14 **ABSTRACT:**

15 Because biochemical processes within individual cells involve a small number of molecules, they  
16 are subject to random fluctuations. As a result, isogenic cell populations show different  
17 concentrations of the same mRNA and protein, even in homogeneous conditions. The extent and  
18 consequences of this stochastic gene expression have only recently been assessed on a genome-  
19 wide scale, in particular thanks to the advent of single cell transcriptomics. Yet the evolutionary  
20 forces shaping this stochasticity remain to be unraveled. We took advantage of recently published  
21 data sets of the single cell transcriptome of the domestic mouse *Mus musculus* to characterize the  
22 genomic patterns of transcriptional stochasticity. We show that noise levels in the mRNA  
23 distributions (*a.k.a.* transcriptional noise) significantly correlate with nuclear domain organization,  
24 gene function and gene age. Position of the encoded protein in biological pathways, however, is the  
25 main factor that explains observed levels of transcriptional noise. We argue that these results are  
26 consistent with models of noise propagation within gene networks. Altogether, transcriptional noise  
27 appears to be under widespread selection and therefore constitutes an important of the phenotypical  
28 component. Differences in variance of expression – not only in mean expression level – potentially  
29 constitute a mechanism of adaptation and should be considered by functional and evolutionary  
30 studies of gene expression.

## 31 **Introduction**

32 Isogenic cell populations display phenotypic variability even in homogeneous environments  
33 (Spudich and Koshland 1976). This observation challenged the clockwork view of the intra-cellular  
34 molecular machinery and led to the recognition of the stochastic nature of gene expression. Because  
35 biochemical reactions result from the interactions of individual molecules in small numbers  
36 (Gillespie 1977), the inherent stochasticity of binding and diffusion processes generates noise along  
37 the biochemical cascade leading to the synthesis of a protein from its encoding gene (**Figure 1**). The  
38 study of stochastic gene expression (SGE), also referred to as expression noise, classically  
39 recognizes two sources of noise. Following the definition introduced by Elowitz et al (Elowitz et al.  
40 2002), extrinsic noise results from variation in concentration, state and location of shared key  
41 molecules involved in the reaction cascade from transcription initiation to protein folding. This is  
42 because molecules that are shared among genes are typically present in low copy numbers relative  
43 to the number of genes actively transcribed (Shahrezaei and Swain 2008). Extrinsic factors also  
44 include physical properties of the cell such as size and growth rate, likely to impact the diffusion  
45 process of all molecular players. Extrinsic factors therefore affect every gene in a cell equally.  
46 Conversely, intrinsic factors generate noise in a gene-specific manner. They involve, for example,  
47 the strength of cis-regulatory elements (Suter et al. 2011) as well as the stability of the mRNA  
48 molecules that are transcribed (McAdams and Arkin 1997; Thattai and Oudenaarden 2001). Every  
49 gene is affected by both sources of stochasticity and the relative importance of each has been  
50 discussed in the literature (Beckes et al. 2005; Raj and Oudenaarden 2008). Shahrezaei and Swain  
51 (Shahrezaei and Swain 2008) proposed a more general and explicit definition for any system, where  
52 intrinsic stochasticity is “generated by the dynamics of the system from the random timing of  
53 individual reactions” and extrinsic stochasticity is “generated by the system interacting with other  
54 stochastic systems in the cell or its environment”. This generic definition therefore includes Raser  
55 and O’Shea’s (Raser and O’Shea 2005) suggestion to further distinguish extrinsic noise occurring

56 “within pathways” and “between pathways”. Other intermediate organization levels of gene  
57 expression are also likely to affect expression noise, such as chromatin structure (Blake et al. 2003;  
58 Hebenstreit 2013), and three-dimensional genome organization (Pombo and Dillon 2015).

59 Pioneering work by Fraser et al (Fraser et al. 2004) has shown that SGE is an evolvable trait which  
60 is subject to natural selection. First, genes involved in core functions of the cell are expected to  
61 behave more deterministically (Barkai and Leibler 1999) because temporal oscillations in the  
62 concentration of their encoded proteins are likely to have a deleterious effect. Second, genes  
63 involved in immune response (Arkin et al. 1998; Norman et al. 2015) and response to  
64 environmental conditions can benefit from being unpredictably expressed in the context of selection  
65 for bet-hedging (Thattai and Oudenaarden 2004). As the relation between fitness and stochasticity  
66 depends on the function of the underlying gene, selection on SGE is expected to act mostly at the  
67 intrinsic level (Newman et al. 2006; Lehner 2008; Wang and Zhang 2011). The molecular  
68 mechanisms by which natural selection operates to regulate expression noise, however, remain to be  
69 elucidated.

70 Due to methodological limitations, seminal studies on SGE (both at the mRNA and protein levels)  
71 have focused on only a handful of genes (Elowitz et al. 2002; Ozbudak et al. 2002; Chubb et al.  
72 2006). The canonical approach consists in selecting genes of interest and recording the change of  
73 their noise levels in a population of clonal cells as a function of either (1) the concentration of the  
74 molecule that allosterically controls affinity of the transcription factor to the promoter region of the  
75 gene (Blake et al. 2003; Bar-even et al. 2006) or (2) mutations artificially imposed in regulatory  
76 sequences (Ozbudak et al. 2002). In parallel with theoretical work (Kepler and Elston 2001;  
77 Kaufmann and van Oudenaarden 2007; Sánchez and Kondev 2008), these pioneering studies have  
78 provided the basis of our current understanding of the proximate molecular mechanisms behind  
79 SGE, namely complex regulation by transcription factors, architecture of the upstream region  
80 (including the presence of TATA box), translation efficiency and mRNA / protein stability (Eldar  
81 and Elowitz 2010). Measurements at the genome scale are however needed in order to go beyond

82 gene idiosyncrasies and particular histories and test hypotheses about the evolutionary forces  
83 shaping SGE (Sauer et al. 2007).

84 The recent advent of single-cell RNA sequencing makes it possible to sequence the transcriptome of  
85 each individual cell in a collection of cell clones and to observe the variation of gene-specific  
86 mRNA quantities across cells. This gives access to a genome-wide assessment of transcriptional  
87 noise. While not accounting for putative noise resulting from the process of translation of mRNA  
88 into protein, transcriptional noise accounts for both noise generated by the transcription process and  
89 noise resulting from the degradation of mRNA molecules (**Figure 1**). Previous studies, however,  
90 have shown that transcription is a limiting step in gene expression, and that transcriptional noise is  
91 therefore a good proxy for expression noise (Newman et al. 2006; Taniguchi et al. 2011). Here, we  
92 used publicly available single-cell transcriptomics data sets to quantify gene-specific transcriptional  
93 noise and relate it to other genomic factors, including protein conservation and position in the  
94 interaction network, in order to uncover the molecular basis of selection on stochastic gene  
95 expression.

## 96 **Material and Methods**

### 97 **Single-cell gene expression data set**

98 We used the dataset generated by Sasagawa et al. (Sasagawa et al. 2013) retrieved from the Gene  
99 Expression Omnibus repository (accession number GSE42268). We analyzed expression data  
100 corresponding to embryonic stem cells in G1 phase, for which more individual cells were  
101 sequenced. A total of 17,063 genes had non-zero expression in at least one of the 20 single cells.  
102 Similar to Shalek et al (Shalek et al. 2014), a filtering procedure was performed where only genes  
103 whose expression level satisfied  $\log(\text{FPKM}+1) > 1.5$  in at least one single cell were kept for further  
104 analyses. This filtering step resulted in a total of 13,660 appreciably expressed genes for which  
105 transcriptional noise was evaluated, compared to 11,640 genes present in the filtered dataset of  
106 Shalek et al (2014).

## 107 **Measure of transcriptional noise**

108 The mean ( $\mu$ ) and variance ( $\sigma^2$ ) of each gene over all single cells were computed. A linear  
109 model was fitted on the log-transformed means and variances in order to estimate the coefficients of  
110 the power law regression:

$$111 \quad \sigma^2 = a \cdot \mu^b \quad (\text{eqn 1})$$

$$112 \quad \log(\sigma^2) = \log(a) + b \cdot \log(\mu) \quad (\text{eqn 2})$$

113 We defined  $F^*$  as the ratio of the observed variance and the predicted variance:

$$114 \quad F^* = \frac{\sigma^2}{a \cdot \mu^b} \quad (\text{eqn 3})$$

115  $F^*$  can be seen as a general expression for the Fano factor ( $a = b = 1$ ) and noise measure ( $a = 1, b =$   
116  $2$ ).  $F^*$  is the stochasticity measure unit with which we produced our results, after estimating the  $a$   
117 and  $b$  parameters from the data.

## 118 **Genome architecture**

119 The mouse proteome from Ensembl (genome version: mm9) was used in order to get coordinates of  
120 all genes. The Hi-C dataset for embryonic stem cells (ES) from Dixon et al (Dixon et al. 2012) was  
121 used to get three-dimensional domain information. Two genes were considered in proximity in one  
122 dimension (1D) if they are on the same chromosome and no protein-coding gene was found  
123 between them. The primary distance (in number of nucleotides) between their midpoint coordinates  
124 was also recorded as 1D a distance measure between the genes. Two genes were considered in  
125 proximity in three dimensions (3D) if the normalized contact number between the two windows the  
126 genes belong was non-null. Two genes belonging to the same window were considered in  
127 proximity. We further computed the relative difference of stochastic gene expression between two  
128 genes by computing the ratio  $(F_2^* - F_1^*) / (F_2^* + F_1^*)$ . For each chromosome, we independently tested  
129 if there was a correlation between the primary distance and the relative difference in stochastic gene  
130 expression with a Mantel test, as implemented in the *ade4* package (Dray and Dufour, 2007). In

131 order to test whether genes in proximity (1D and 3D) had more similar transcriptional noise than  
132 distant genes, we contrasted the relative differences in transcription noise between pairs of genes in  
133 proximity and pairs of distant genes. As we test all pairs of genes, we performed a randomization  
134 procedure in order to assess the significance of the observed differences by permuting the rows and  
135 columns in the proximity matrices 1,000 times. Linear models accounting for spatial interactions  
136 with genes were fitted using the generalized least squares (GLS) procedure as implemented in the  
137 “nlme” package for R (Pinheiro et al 2016). A correlation matrix between all tested genes was  
138 defined as  $G = \{g_{i,j}\}$ , where  $g_{i,j}$  is the correlation between genes  $i$  and  $j$ . We defined  
139  $g_{i,j} = 1 - \exp(-\lambda \delta_{i,j})$ , where  $\delta_{i,j}$  takes 1 if genes  $i$  and  $j$  are in proximity, 0 otherwise.  
140 Parameter  $\lambda$  was estimated jointly with other model parameters, it measures the strength of the  
141 genome “spatial” correlation. Parameters were estimated using the maximum likelihood (ML)  
142 procedure, instead of the default restricted maximum likelihood (REML) in order to perform model  
143 comparison using Akaike’s information criterion (AIC).

## 144 **Biological pathways and network topology**

145 The 13,660 Ensembl ids in our dataset were mapped to 13,136 Entrez ids. We kept only genes with  
146 unambiguous mapping, resulting in 11,032 Entrez ids for the Reactome pathway analysis. We  
147 defined genes either in the top 10% least noisy or in the top 10% most noisy as candidate sets and  
148 used the Reactome PA package (Yu and He 2015) to search the mouse Reactome database for  
149 overrepresented pathways with a 1% false discovery rate.

150 Thirteen thousand six hundred and sixty Ensembl ids mapped to a total of 29,859 UniProt ids. For  
151 network analyses, we removed UniProt ids which were not annotated to the Reactome database,  
152 resulting in a total of 4,929 UniProt ids after this first step. We then removed genes that mapped  
153 ambiguously from Ensembl to UniProt, retaining 3,959 Ensembl / UniProt ids for which we  
154 computed centrality measures. At the network level, size, transitivity and diameter could be  
155 calculated for every pathway using a combination of three R packages (“pathview” (Luo 2013),

156 “igraph” (Csardi 2015) and “graphite” (Sales et al 2016)). As the calculation of assortativity does  
157 not handle missing data (that is, nodes of the pathway for which no value could be computed), we  
158 computed assortativity on the sub-network with nodes for which data were available. A principal  
159 component analysis was conducted on all network centrality measures using the ade4 package for R  
160 (Dray et al 2007). Models of F\* assortativity measures were fitted and compared using Multivariate  
161 Adaptive Regression Splines, as implemented in the “earth” package in R (Milborrow 2016).

## 162 **Sequence divergence**

163 The Ensembl's Biomart interface was used to retrieve the proportion of non-synonymous (Ka) and  
164 synonymous (Ks) divergence estimates for each mouse gene relative to the human ortholog. This  
165 information was available for 13,136 genes.

## 166 **Gene Age**

167 The relative taxonomic ages of the mouse genes have been computed and is available in the form of  
168 20 Phylostrata (Neme and Tautz 2013). Each Phylostratum corresponds to a node in the  
169 phylogenetic tree of life. Phylostratum 1 corresponds to “All cellular organisms” whereas  
170 Phylostratum 20 corresponds to “*Mus musculus*”, with other levels in between. We used this  
171 published information to assign each of our genes to a specific Phylostratum and used this as a  
172 relative measure of gene age: Age = 21 - Phylostratum, so that an age of 1 corresponds to genes  
173 specific to *M. musculus* and genes with an age of 20 are found in all cellular organisms.

## 174 **Linear modeling**

175 The first axis (43.324% of the total variance) of the principal component analysis of centrality  
176 measures was used as a synthetic measure of centrality (variable SynthNet, see **Figure 5**). We built  
177 a linear model with F\* as a response variable and the three predictor variables SynthNet, Ka / Ks  
178 ratio and gene age, as well as their double and triple interactions. As the fitted model displayed  
179 significant departure to normality, it was further transformed using the Box-Cox procedure



180 (“boxcox” function from the MASS package for R (Venables and Ripley 2002)). The Box-Cox  
181 transformed model was then subject to backward model selection in order to discard extra-  
182 numerous parameters. The selected model according to Akaike’s information criterion only contains  
183 single effects and the pairwise interaction between  $K_a / K_s$  and age. Residues of the selected model  
184 had independent residue distributions (Ljung-Box test, p-value = 0.09402) but still displayed slight  
185 departure to normality (Shapiro-Wilk test, p-value = 1.22e-7), and heteroscedasticity (Harrison-  
186 McCabe test, p-value = 0.001333). In order to assess whether these departures from the Gauss-  
187 Markov assumptions could bias our results, we used two complementary approaches. First we used  
188 the “robcov” function of the “rms” package in order to get robust estimates of the effect  
189 significativity (Harrel 2015). Second, we performed a quantile regression using the “rq” function  
190 (parameter tau set to 0.5, equivalent to a median regression) of the “quantreg” package for R  
191 (Koenker, 2016).

## 192 **Gene Ontology Enrichment**

193 Eight thousand three hundreds and twenty five out of the 13,660 genes were associated with Gene  
194 Ontology (GO) terms. We tested genes at both ends of the  $F^*$  spectrum for GO terms enrichment  
195 using the same threshold percentile of 10% low / high noise genes as we did for the Reactome  
196 analysis. We carried out GO enrichment analyses using two different algorithms: “Parent-child”  
197 (Grossmann et al. 2007) and “Weight01”, a mixture of two algorithms developed by Alexa et al  
198 (Alexa et al. 2006). We kept only the terms that appeared simultaneously on both Parent-child and  
199 Weight01 under 10% significance level, controlling for multiple testing using the FDR method  
200 (Benjamini and Hochberg 1995).

## 201 **Additional data sets**

202 The aforementioned analyses were additionally conducted on the data set of Shalek et al (Shalek et  
203 al. 2014). Following the filtering procedure established by the authors in the original paper, genes  
204 which did not satisfied the condition of being expressed by an amount such that  $\log(\text{TPM}+1) > 1$  in

205 at least one of the 95 single cells were further discarded, where TPM stands for transcripts per  
206 million. This cut-off threshold resulted in 11,640 genes being kept for investigation. The rest of the  
207 analyses was conducted in the same way as in Sasagawa's data set.

208 All datasets and scripts to reproduce the results of this study are available at Figshare, under the  
209 DOI 10.6084/m9.figshare.4587169.

## 210 **Results**

### 211 **A new measure of noise to study genome-wide patterns of stochastic** 212 **gene expression**

213 We analyzed the dataset generated by Sasagawa et al (2013), which quantifies gene-specific  
214 amounts of mRNA as fragments per kilobase of transcripts per million mapped fragments (FPKM)  
215 values for each gene and each individual cell. Among these, we selected all genes in a subset  
216 containing 20 embryonic stem cells in G1 phase in order to avoid recording variance that is due to  
217 different cell types or cell-cycle phases. The Quartz-Seq sequencing protocol captures every poly-A  
218 RNA present in the cell at one specific moment, allowing to assess transcriptional noise. Following  
219 Shalek et al (2014) we first filtered out genes that were not appreciably expressed in order to reduce  
220 the contribution of technical noise to the total noise. For each gene we further calculated the mean  $\mu$   
221 in FPKM units and variance  $\sigma^2$  in FPKM<sup>2</sup> units, as well as two previously published measures of  
222 SGE: *Fano factor*, usually referred to as the bursty parameter, defined as  $\sigma^2/\mu$  and *Noise*, defined  
223 as the coefficient of variation squared ( $\sigma^2/\mu^2$ ). Both the variance and the *Fano factor* are  
224 monotonically increasing functions of the mean (**Figure 2A**). *Noise* is inversely proportional to  
225 mean expression (**Figure 2A**), in agreement with previous observations at the protein level (Bar-  
226 even et al. 2006; Taniguchi et al. 2011). While this negative correlation was theoretically predicted  
227 (Tao et al. 2007), it may confound the analyses of transcriptional noise at the genome level, because  
228 mean gene expression is under specific selective pressure (Pál et al. 2001). In order to disentangle

229 these effects, we developed a new quantitative measure of noise, independent of the mean  
230 expression level of each gene. To achieve this we fitted a linear model in the log-space plot of  
231 variance *versus* mean and extracted the slope (a) and intercept (b) of the regression line. We defined  
232  $F^*$  as  $\sigma^2/(a \cdot \mu^b)$  (see Material and Methods) that is, the ratio of the observed variance over the  
233 variance component predicted by the mean expression level. Genes with  $F^* < 1$  have a variance  
234 lower than expected according to their mean expression whereas genes with  $F^* > 1$  behave the  
235 opposite way (**Figure 2A**). As expected,  $F^*$  displays no significant correlation with the mean  
236 (Kendall's tau = -0.009, p-value = 0.106, **Figure 2B**). We therefore use  $F^*$  as a measure of SGE  
237 throughout this study.

## 238 **Stochastic gene expression correlates with the three-dimensional, but** 239 **not one-dimensional, structure of the genome**

240 We first sought to investigate whether genome organization significantly impacts the patterns of  
241 stochastic gene expression. We assessed whether genes in proximity along chromosomes display  
242 more similar amount of transcriptional noise than distant genes. We tested this hypothesis by  
243 computing for each pair of genes their primary distance on the genome, as well as their relative  
244 difference in transcriptional noise (see Methods). We found no significant association between the  
245 two distances (Mantel tests, each chromosome tested independently). Neighbor genes in one  
246 dimension, however, have significantly more similar transcriptional noise than non-neighbor genes  
247 (permutation test, p-value < 1e-3, **Figure 3**). Using Hi-C data from mouse embryonic cells (Dixon  
248 et al. 2012), we report that genes in proximity in three-dimensions have significantly more similar  
249 transcriptional noise than genes not in contact (permutation test, p-value < 1e-3, **Figure 3**). Most  
250 neighbor genes in one-dimension also appear to be close in three-dimensions and the effect of 3D  
251 contact is stronger than that of 1D contact. These results therefore suggest that the three-  
252 dimensional structure of the genome has a stronger impact on stochastic gene expression than the

253 position of the genes along the chromosomes. We further note that while highly significant, the size  
254 of this effect is small, with a difference in relative expression of -1.12% (**Figure 3**).

## 255 **Low noise genes are enriched for housekeeping functions**

256 We investigated the function of genes at both ends of the  $F^*$  spectrum. We defined as candidate  
257 gene sets the top 10% least noisy or the top 10% most noisy genes in our data set, and tested for  
258 enrichment of GO terms and Reactome pathways (see Methods). It is expected that genes encoding  
259 proteins participating in housekeeping pathways are less noisy because fluctuations in concentration  
260 of their products might have stronger deleterious effects (Pedraza and van Oudenaarden 2005). On  
261 the other hand, stochastic gene expression could be selectively advantageous for genes involved in  
262 immune and stress response, as part of a bet-edging strategy (eg Arkin et al. 1998; Shalek et al.  
263 2013). While we do not find any significantly enriched Reactome pathway in the high noise gene  
264 set, a total of 37 pathways were significantly over-represented in the low-noise gene set (false  
265 discovery rate set to 1%). Interestingly, the top most significant pathways belong to modules related  
266 to translation (initiation, elongation, termination as well as ribosomal assembly), as well as several  
267 modules relating to gene expression, including chromatin regulation and mRNA splicing (**Figure**  
268 **4**). GO terms enrichment tests lead to similar results (**Table 1**): we found the molecular functions  
269 “nucleic acid binding” and “structural constituent of ribosome”, the biological processes  
270 “nucleosome assembly”, “innate immune response in mucosa” and “translation”, as well as the  
271 cellular component “nuclear nucleosome” to be enriched in the low noise gene set. All these terms  
272 but one relate to gene expression.

273 The lack of significantly enriched Reactome pathways by high noise genes can potentially be  
274 explained by the nature of the data set: as the original experiment was based on unstimulated cells,  
275 genes that directly benefit from high SGE might not be expressed in these experimental conditions.  
276 In accordance, high-noise genes are not found to be enriched for any GO term.

## 277 **Highly connected proteins are synthesized by low-noise genes**

278 The structure of the interaction network of proteins inside the cell can greatly impact the  
279 evolutionary dynamics of genes (Jeong et al. 2000; Barabási and Oltvai 2004). Furthermore, the  
280 contribution of each constitutive node within a given network varies. This asymmetry is largely  
281 reflected in the power-law-like degree distribution that is observed in virtually all biological  
282 networks (Barabási and Albert 1999) with a few genes displaying a lot of connections and a  
283 majority of genes displaying only a few. The individual characteristics of each node in a network  
284 can be characterized by various measures of centrality (**Newmann 2003**). Following previous  
285 studies on protein evolutionary rate (Fraser et al. 2002; Hahn et al. 2004; Jovelin and Phillips 2009)  
286 we asked whether, at the gene level, there is a link between centrality of a protein and the amount of  
287 transcriptional noise as measured by  $F^*$ , using five centrality metrics measured from the graphs  
288 provided by the Reactome database (**Croft et al. 2014**). Our data set encompasses 13,660 genes for  
289 which both gene expression data and pathway annotations were available.

290 We first estimated the pleiotropy index of single genes by counting in how many different pathways  
291 the corresponding proteins are involved in. We then computed centrality measures as averages over  
292 all pathways in which each gene is involved. A principal component analysis revealed two groups of  
293 measures (**Figure 5**). The first measures are related to the number of interacting partners of a given  
294 protein. These measures are all negatively correlated with transcriptional noise: the more central a  
295 protein is, the less transcriptional noise it displays (**Table 2**). The most simple measure of centrality  
296 of a node is its degree, that is, the number of nodes it is directly connected with (Kendall tau =  
297  $-0.071$ , p-value =  $6.27e-11$ ; **Table 2**): the more connections a protein makes, the less noisy its  
298 synthesis is. The hub score and authority score are both calculated from the adjacency matrix of a  
299 graph, which describes the distribution of edges among the nodes. The hub score estimates the  
300 extent to which a node links to other influent nodes and the authority score estimates the importance  
301 of a node by assessing how many hubs link to it. Both scores negatively correlate similarly with  $F^*$   
302 (Hub score: Kendall's tau =  $-0.073$ , p-value =  $1.474e-11$ ; Authority score: Kendall's tau =  $-0.068$ , p-

303 value =  $3.652e-10$ ). We also observed that pleiotropy is negatively correlated with  $F^*$  (Kendall's tau  
304 =  $-0.049$ , p-value =  $1.149e-05$ ; **Table 2**), although to a lesser extent. This effect is most likely  
305 explained by the fact that pleiotropic genes are themselves more central (e.g. correlation of  
306 pleiotropy and node degree: Kendall's tau =  $0.229$ , p-value  $< 2.2e-16$ ). Altogether, these results  
307 suggest that natural selection acts to reduce expression noise in genes encoding highly connected  
308 proteins.

309 The two measures of centrality “closeness” and “betweenness” are highly correlated with each  
310 other, but are independent of the degree measures (**Figure 5**). Closeness is a measure of the  
311 topological distance between a node and every other reachable node. The fewer steps (edge hops) it  
312 takes for a protein to reach every other protein in a network, the higher its closeness. We do not find  
313 any significant relation between  $F^*$  and the closeness value of genes (Kendall's tau =  $-0.005$ , p-  
314 value =  $0.663$ ). Similarly, betweenness is proportional to the frequency with which a protein  
315 belongs to the shortest path between every pair of nodes. In modular networks (Hartwell et al. 1999)  
316 nodes that connect different modules are extremely important to the cell (Guimera and Amaral  
317 2005) and are implied to show high betweenness scores. The same was pointed out by Joy et al (Joy  
318 et al. 2005) who showed that in yeast, high betweenness proteins tend to be older and more  
319 essential, which we also see in our data set (Betweenness vs gene age, Kendall's tau =  $0.077$ , p-  
320 value =  $7.569e-10$ ; Betweenness vs  $K_a/K_s$ , Kendall's tau =  $-0.077$ , p-value =  $7.818e-12$ ). It has been  
321 argued, however, that in protein-protein interaction networks high betweenness proteins are less  
322 essential due to the lack of directed information flow, compared to, for instance, regulatory  
323 networks (Yu et al. 2007). In agreement with this latter hypothesis, we do not find any significant  
324 correlation between betweenness and transcriptional noise (Kendall's tau =  $-0.014$ , p-value =  $0.206$ ),  
325 and report that degree measures are better predictors of constraints in SGE than betweenness.

326 It was previously shown that centrality negatively correlates with evolutionary rate (Hahn and Kern  
327 2004). Our results suggest that central genes are selectively constrained for their transcriptional  
328 noise such that centrality also influences the regulation of gene expression. Interestingly, it has been

329 reported that central genes tend to be more duplicated (Vitkup et al. 2006). The authors proposed  
330 that such duplication events would have been favored as they would confer greater robustness to  
331 deleterious mutations in proteins. Our results suggest another, non exclusive, possible advantage:  
332 having more gene copies could reduce transcriptional noise by averaging the amount of transcripts  
333 produced by each gene copy (Raser and O'Shea 2005).

### 334 **Network structure impacts transcriptional noise of constitutive genes**

335 Whereas estimators of node centrality highlight gene-specific properties inside a given network,  
336 measures at the whole-network level enable the comparison of networks with distinct properties.  
337 We computed the size, diameter and transitivity for each annotated network in our data set (1,364  
338 networks, Supplementary Material), as well as average measures of node scores (degree, hub score,  
339 authority score, closeness, betweenness) which we compare with the average  $F^*$  measure of all  
340 constitutive nodes. The size of a network is defined as its total number of nodes, while diameter is  
341 the length of the shortest path between the two most distant nodes. Transitivity is a measure of  
342 connectivity, defined as the average of all nodes' clustering coefficients, itself defined for each node  
343 as the proportion of its neighbors that also connect to each other. Interestingly, while network size is  
344 positively correlated with average degree and transitivity (Kendall's tau = 0.372, p-value < 2.2e-16  
345 and Kendall's tau = 0.119, p-value = 2.807, respectively), diameter displays a positive correlation  
346 with average degree (Kendall's tau = 0.202, p-value < 2.2e-16) but a negative correlation with  
347 transitivity (Kendall's tau = -0.115, p-value = 2.237e-08). This is because diameter increases  
348 logarithmically with size, that is, addition of new nodes to large networks do not increase the  
349 diameter as much as additions to small networks. This suggests that larger networks are relatively  
350 more compact than smaller ones, and their constitutive nodes are therefore more connected. We find  
351 that average transcriptional noise correlates negatively with network size (Kendall's tau = -0.0594,  
352 p-value = 0.001376), while being independent of the diameter (Kendall's tau = 0.0125, p-value =  
353 0.5366). Transcriptional noise is also strongly negatively correlated with all averaged centrality

354 measures (**Table 3**). These results are in line with the node-based analyses, and show that the more  
355 connections a network has, the less stochastic the expression of the underlying genes is. This  
356 supports the view of Raser and Oshea (Raser and O'Shea 2005) that the gene-extrinsic, pathway-  
357 intrinsic level is functionally pertinent and needs to be distinguished from the globally extrinsic  
358 level.

359 We further asked whether genes with similar transcriptional noise tend to synthesize proteins that  
360 connect to each other (positive assortativity) in a given network, or on the contrary, tend to avoid  
361 each other (negative assortativity). We considered all Reactome pathways annotated to the mouse  
362 and estimated their respective  $F^*$  assortativity. We found the mean assortativity to be significantly  
363 negative, with a value of -0.131 (one sample Wilcoxon rank test,  $p$ -value  $< 2.2e-16$ ), meaning that  
364 proteins with different  $F^*$  values tend to connect with each other (**Figure 6**). Maslov & Sneppen  
365 (Maslov and Sneppen 2002) reported a negative assortativity between hubs in protein-protein  
366 interaction networks, which they hypothesized to be the result of selection for reduced vulnerability  
367 to deleterious perturbations. In our data set, however, we find the assortativity of hub scores to be  
368 slightly but significantly positive (average of 0.060, one sample Wilcoxon rank test,  $p$ -value =  
369 0.0002702, **Figure 6**), although with a large distribution of assortativity values. As we showed that  
370 hub scores correlates negatively with  $F^*$  (**Table 2**), we asked whether the negative assortativity of  
371 hub proteins can at least partly explain the negative assortativity of  $F^*$ . We found a significantly  
372 positive correlation between the two assortativity measures (Kendall's tau = 0.338,  $p$ -value  $< 2.2e$ -  
373 16). The relationship between the measures, however, is not linear. A Multivariate Adaptive  
374 Regression Spline was fitted to the two assortativity measures and resulted in a selected model with  
375 a strong positive correlation for hub score assortativity below -0.16, and virtually no correlation  
376 above (**Figure 6**), suggesting a distinct relationship between hub score and  $F^*$  for negative and  
377 positive hub score assortativity. Negative assortativity of hub proteins contributes to a negative  
378 assortativity of SGE (Kendall's tau = 0.381,  $p$ -value  $< 2.2e-16$ ), while for pathways with positive  
379 hub score assortativity the effect disappears (Kendall's tau = 0.052,  $p$ -value = 0.06282). While



380 assortativity of  $F^*$  is closer to 0 for pathways with positive assortativity of hub score, we note that it  
381 is still significantly negative (average = -0.047, one sample Wilcoxon test with p-value < 2.2e-16).  
382 This suggests the existence of additional constraints that act on the distribution of noisy proteins in  
383 a network.

## 384 **Transcriptional noise is positively correlated with the evolutionary** 385 **rate of proteins**

386 Evolutionary divergence between orthologous coding sequences in yeast has been shown to  
387 correlate negatively with fitness effect on knock-out strains of the corresponding genes (Hirsh and  
388 Fraser 2001) demonstrating that protein functional importance is reflected in the strength of  
389 purifying selection acting on it. Fraser et al (Fraser et al. 2004) studied transcription and translation  
390 rates of genes in the yeast *Saccharomyces cerevisiae*, and classified genes in distinct noise  
391 categories according to their expression strategies. They reported that genes with high fitness effect  
392 display lower expression noise than the rest. Following these early observations, we hypothesized  
393 that genes under strong purifying selection at the protein sequence level should also be highly  
394 constrained for their expression and therefore display a lower transcriptional noise. To test this  
395 hypothesis, we correlated  $F^*$  with the ratio of non-synonymous ( $K_a$ ) to synonymous substitutions  
396 ( $K_s$ ), as measured by sequence comparison between mouse genes and their human orthologs, after  
397 discarding genes with evidence for positive selection ( $n = 5$ ). In agreement with our prediction, we  
398 report a significantly positive correlation between the  $K_a / K_s$  ratio and  $F^*$  (**Figure 7**, Kendall's tau  
399 = 0.0619, p-value < 2.2e-16), that is, highly constrained genes display less transcriptional noise than  
400 fast evolving ones. These results demonstrate that purifying selection is acting on expression noise  
401 in addition to the protein sequence and mean expression level.

## 402 **Older genes are less noisy than younger ones**

403 Evolution of new genes was long thought to occur via duplication and modification of existing  
404 genetic material (“evolutionary tinkering”, (Jacob 1977)). Evidence for *de novo* gene emergence is  
405 however becoming more and more common (Tautz and Domazet-Lošo 2011; Xie et al. 2012). *De*  
406 *novo* created genes undergo several optimization steps, including their integration into a regulatory  
407 network (Neme and Tautz 2013). We tested whether this historical process of incorporation into  
408 pathways impacts the evolution of transcriptional noise. As older genes tend to be more conserved  
409 (Wolf et al. 2009), we further controlled for sequence conservation, as measured by the Ka / Ks  
410 ratio of the gene. We used the phylostratigraphic approach of Neme & Tautz (Neme and Tautz  
411 2013), which categorizes genes into 20 strata, to compute gene age and tested for a correlation with  
412  $F^*$ , correcting for sequence divergence as a putative covariate (**Figure 7**, Kendall's tau = -0.047, p-  
413 value = 3.001e-13; partial correlation controlling for gene sequence conservation). This negative  
414 correlation still holds when we discard very recent *de novo* genes (belonging to Phylostratum 20) to  
415 minimize influence of putative annotation errors (Kendall's tau = -0.047, p-value = 3.534e-13).  
416 These results suggest that older genes are more deterministically expressed while younger genes are  
417 more noisy, independently of the selective pressure acting on them.

418 Biological network growth is currently thought to occur by preferential attachment (Jeong et al.  
419 2001): the more edges a node has, the more likely this node is to make yet another edge with a  
420 newly arrived protein. This would lead to older genes playing more central roles in more pathways,  
421 and therefore explain the correlation of  $F^*$  and gene age. Under this hypothesis, we expect the  
422 centrality of a gene to positively correlate with gene age. However, we observe the opposite trend  
423 (average degree vs gene age, Kendall's tau = -0.090, p-value = 3.578e-13), indicating that older  
424 proteins actually tend to have fewer edges. A possible explanation to this trend is that older genes  
425 are under stronger purifying selection (gene age vs Ka / Ks, Kendall's tau = -0.139; p-value < 2.2e-  
426 16) preventing them from linking to many younger proteins, indicating that the preferential  
427 attachment model is an oversimplification of how intra-cellular network growth is achieved

428 (Barabási and Oltvai 2004; Kim et al. 2013). In the same vein, gene age is not associated with  
429 higher pleiotropy (pleiotropy vs gene age: Kendall's tau = -0.012, p-value = 0.353). To see if this  
430 inverted preferential attachment could be explained by distinct constraints on more ancient  
431 housekeeping genes, we tested for the same correlations using only younger genes (*i.e.*, genes from  
432 Phylostrata 7, Bilateria, to 20, *Mus musculus*, which are not enriched for any particular  
433 housekeeping function [n = 1048]). This time we observe a positive, albeit non-significant  
434 correlation (average degree vs. gene age: Kendall's tau = 0.053, p-value = 0.2953), indicating that  
435 more ancient genes evolve their connectivity differently from younger ones. The effect of gene age  
436 on transcriptional noise therefore appears independent of the effect of selective constraints and  
437 position of genes in the network. While we cannot rule out that functional constraints not fully  
438 accounted for by the Ka / Ks ratio or unavailable functional annotations explain at least partially the  
439 correlation of gene age and transcriptional noise, a possible hypothesis is that ancient gene have  
440 acquired more complex regulation schemes through time. Higher order interaction in the regulation  
441 network involve for instance negative feedback loops, which have been shown to stabilize gene  
442 expression and reduce expression noise (Beckeski and Serrano 2000; Thattai and Oudenaarden  
443 2001).

## 444 **Position in the protein network is the main driver of transcriptional** 445 **noise**

446 Since network topology measures, Ka / Ks ratio and gene age are correlated variables, we sought at  
447 disentangling potential confounding effects by modeling the patterns of transcriptional noise as a  
448 function of all predictive factors, as well as their interactions. Because network centrality measures  
449 are themselves not independent from each other, we used the first axis of the principal component  
450 analysis of network variables (**Figure 5A**) as a synthetic measure of node centrality. This measure  
451 essentially captures the effect of nodes degree, hub and transitivity scores (**Figure 5A**) and is  
452 negatively correlated with F\* (Kendall's tau = -0.075, p-value = 2.858e-12, **Figure 7**). We then

453 constructed a linear model with  $F^*$  as a response variable, and synthetic network centrality  
454 (SynthNet, explaining 43.32% of the total inertia), sequence conservation ( $K_a / K_s$ ) and gene age as  
455 explanatory variables, as well as all their possible interactions. We conducted a model selection  
456 procedure where we allowed for interactions between variables of up to three degrees and tested  
457 significance of coefficients on the selected model, controlling for various model departures (see  
458 Methods and **Table 4** for results). All individual variables are retained, as well as the interaction  
459 term between  $K_a / K_s$  and gene age. When taken together, only the network centrality measure and  
460 gene age are significant (**Table 4**), and the coefficients in the multiple regression have the same sign  
461 as the non-parametric correlation coefficients observed for  $F^*$ . All variables explain 2.98% of  
462 variance together. This small value indicates either that gene idiosyncrasies largely predominate  
463 over general effects, or that our estimates of transcriptional noise have a large measurement error, or  
464 both. An analysis of variance shows that the three individual variables explain a significant part of  
465 the variance, with centrality measures explaining the largest part (SynthNet variable, 1.62%  
466 variance explained, Fisher's test p-value =  $9.552e-15$ ). Gene age only explains 0.99% of the  
467 variance (Fisher's test p-value =  $1.386e-09$ ) and functional constraints 0.31% ( $K_a / K_s$  variable,  
468 Fisher's test p-value = 0.0006567). This suggests that position in protein network is the main driver  
469 of the evolution of gene-specific stochastic expression. It also suggests that gene age has an effect  
470 on  $F^*$  independent of the strength of purifying selection on the genes.

471 We further included the effect of three-dimensional organization of the genome in order to assess  
472 whether it could be a confounding factor. We developed a correlation model allowing for genes in  
473 contact to have correlated values of transcriptional noise. The correlation model was fitted together  
474 with the previous linear model in the generalized least square (GLS) framework. This model allows  
475 for one additional parameter,  $\lambda$ , which captures the strength of correlation due to three-dimensional  
476 organization of the genome (see Methods). The estimate of  $\lambda$  was found to be 0.0029, which means  
477 that the spatial autocorrelation of transcriptional noise is low on average. While this estimate is  
478 significantly higher than zero, model comparison using Akaike's information criterion favors the

479 linear model without three-dimensional correlation. Consistently, accounting for this correlation  
480 does not change significantly our estimates (**Table 4**), confirming network centrality measures as  
481 the main factor explaining the distribution of transcriptional noise.

## 482 **Analysis of bone marrow-derived dendritic cells supports the** 483 **generality of the results to other cell types**

484 We assessed the reproducibility of our results by analyzing an additional single-cell transcriptomics  
485 data set of 95 unstimulated bone marrow-derived dendritic cells (Shalek et al. 2014). After filtering  
486 (see Methods), the data set consisted of 11,640 genes. Using the same normalization procedure as  
487 for the Sasagawa data set, we nonetheless report a weak but significant negative correlation  
488 between  $F^*$  and the mean expression ( $-0.068$ ,  $p$ -value  $< 2.2e-16$ ). Despite this correlation, the  
489 patterns we observed with the bone marrow-derived dendritic cells dataset are qualitatively and  
490 quantitatively consistent with the ones obtained with embryonic stem cells (**Table S1**), supporting  
491 the generality of our observations to other cell types. This dataset further revealed a significant  
492 negative correlation of  $F^*$  with closeness and betweenness.

## 493 **Biological, not technical noise is responsible for the observed patterns**

494 The variance in gene expression measured from single-cell transcriptomics is a combination of  
495 biological and technical variance. While the two sources of variance are a priori independent, gene-  
496 specific technical variance has been observed in micro-array experiments (Pozhitkov et al. 2007)  
497 making a correlation of the two types of variance plausible. If similar effects also affect RNA-Seq  
498 experiments, technical variance could be correlated to gene function and therefore act as a covariate  
499 in our analyses. In order to assess whether this is the case, we used the dataset of Shalek et al  
500 (Shalek et al. 2013), which contains both single-cell transcriptomics and 3 replicates of 10,000  
501 pooled-cell RNA sequencing. In traditional RNA sequencing, which is typically performed on  
502 pooled populations of several thousands of cells, biological variance is averaged out so that the

503 resulting measured variance between replicates is essentially the result of technical noise. We  
504 computed the mean and variance in expression of each gene across the three populations of cells.  
505 By plotting the variance versus the mean in log-space, we were able to compute a “technical”  $F^*$  (  
506  $F_t^*$ ) value for each gene (Methods). We conducted our correlation analyses using  $F_t^*$  instead of  
507  $F^*$ . We report no significant correlation between  $F_t^*$  and network centralities and gene age. There  
508 is a significant correlation between  $F^*$  and sequence conservation (Kendall's tau = 0.036, p-value =  
509 1.085e-06). However, this correlation is weaker than the one reported between  $F^*$  and sequence  
510 conservation for the single-cell data set (Kendall's tau = 0.0619, p-value < 2.2e-16), thus not being  
511 sufficient to explain the latter finding. At the pathway level, correlations with  $F^*$  are either non-  
512 significant or go in the opposite direction than the ones observed in single-cell datasets. In addition,  
513 there was no enrichment of the 10<sup>th</sup> and 90<sup>th</sup>  $F_t^*$  percentiles for any particular pathway or GO  
514 term. These results support our conclusion that the correlations we observe are due to variations that  
515 are biological, not technical.

## 516 Discussion

517 Throughout this work, we provided the first genome-wide evolutionary and systemic study of  
518 transcriptional noise, using a mouse cell as a model. We have shown that transcriptional noise  
519 correlates with functional constraints both at the level of the gene itself via the protein it encodes,  
520 but also at the level of the pathway(s) the gene belongs to. We further discuss here potential  
521 confounding factors in our analyses and argue that our results are compatible with selection acting  
522 to reduce noise-propagation at the network level.

523 In this study, we exhibited several factors explaining the variation in transcriptional noise between  
524 genes. While highly significant, the effects we report are of small size, and we only explain a few  
525 percent of the total observed variance. There are several possible explanations for this reduced  
526 explanatory power: (1) transcriptional noise is a proxy for noise in gene expression, at which

527 selection occurs (**Figure 1**). As transcriptional noise is not randomly distributed across the genome,  
528 it must constitute a significant component of expression noise, in agreement with previous  
529 observations (Blake et al. 2003; Newman et al. 2006). Translational noise, however, might  
530 constitute an important part of the expression noise and was not assessed in this study. (2) Gene  
531 expression levels were assessed on embryonic stem cells in culture. Such an experimental system  
532 may result in gene expression that differs from that in natural conditions under which natural  
533 selection acted. (3) Functional annotations, in particular pathways and gene interactions are still  
534 incomplete, and network-based measures have most likely large estimation errors. (4) While the  
535 newly introduced  $F^*$  measure allowed us to assess the distribution of transcriptional noise  
536 independently of the average mean expression – therefore constituting an improvement over  
537 previous studies – it does not capture the full complexity of SGE. Explicit modeling, for instance  
538 based in the Beta-Poisson model (Vu et al. 2016) is a promising avenue for the development of  
539 more sophisticated quantitative measures.

540 In a pioneering study, Fraser et al, followed by Shalek et al, demonstrated that essential genes  
541 whose deletion is deleterious and genes encoding subunits of molecular complexes (Fraser et al.  
542 2004) as well as housekeeping genes (Shalek et al. 2013) display reduced gene expression noise.  
543 Our findings go beyond these earlier observations as they reveal that network centrality measures  
544 are the major explanatory factor of the distribution of transcriptional noise in the genome. This  
545 suggests that selection at the pathway level is a widespread phenomenon that drives the evolution of  
546 SGE at the gene level. This multi-level selection mechanism, we propose, can be explained by  
547 selection against noise propagation within networks. It has been experimentally demonstrated that  
548 expression noise can be transmitted from one gene to another gene with which it is interacting  
549 (Pedraza and van Oudenaarden 2005). Large noise at the network level is deleterious (Barkai and  
550 Leibler 1999) but each gene does not contribute equally to it, thus the strength of selective pressure  
551 against noise varies among genes in a given network. We have shown that highly connected,  
552 “central” proteins typically display reduced transcriptional noise. Such nodes are likely to constitute

553 key players in the flow of noise in intra-cellular networks as they are more likely to transmit noise  
554 to other components. In accordance with this hypothesis, we find genes with the lowest amount of  
555 transcriptional noise to be enriched for top-level functions, in particular involved in the regulation  
556 of other genes.

557 These results have several implications for the evolution of gene networks. First, this means that  
558 new connections in a network can potentially be deleterious if they link genes with highly stochastic  
559 expression. Second, distinct selective pressures at the “regulome” and “interactome” levels (**Figure**  
560 **1**) might act in opposite direction. We expect genes encoding highly connected proteins to have  
561 more complex regulation schemes, in particular if their proteins are involved in several biological  
562 pathways. In the simplest scenario of open chromatin and absence of transcription factors and  
563 enhancers, each gene has a constant probability of being transcribed per time unit and the resulting  
564 amount of transcripts follows a Poisson distribution with *Fano factor* equal to 1, that is, with  
565 variance equal to mean expression (Raj and Oudenaarden 2008). The early evidence for widespread  
566 bursty transcription, leading to overdispersion (variance > mean expression, (Raj et al. 2006; So et  
567 al. 2011)) suggests that complex regulation leads to increased transcriptional noise. Subsequently,  
568 several studies demonstrated that expression noise of a gene positively correlates with the number  
569 of transcription factors controlling its regulation (Sharon et al. 2014). Central genes, while being  
570 under negative selection against stochastic behavior, are then more likely to be controlled by  
571 numerous transcription factors which will tend to increase transcriptional noise. As a consequence,  
572 if the number of connections at the interactome level is highly correlated with the number of  
573 connections at the regulome level, there must exist a trade-off in the number of connections a gene  
574 can make in a network. Alternatively, highly connected genes might evolve regulatory systems  
575 allowing them to uncouple these two levels: negative feedback loops, for instance, where the  
576 product of a gene down-regulates its own production have been shown to stabilize expression and  
577 significantly reduce stochasticity (Becskei and Serrano 2000; Dublanche et al. 2006; Tao et al.



2007). We therefore predict that negative feedback loops are more likely to occur at genes that are more central in protein networks, as they will confer a greater advantage in terms of SGE.

Our results enabled the identification of possible selective pressures acting on the level of stochasticity in gene expression. The mechanisms by which the amount of stochasticity can be controlled remain however to be elucidated. We evoked the existence of negative feedback loops which reduce stochasticity and the multiplicity of upstream regulator which increase it. Recent work by Wolf et al (Wolf et al. 2015) and Metzger et al (Metzger et al. 2015) add further perspective to this scheme. Wolf and colleagues found that in *Escherichia coli* noise is higher for natural than experimentally evolved promoters selected for their mean expression level. They hypothesized that higher noise is selectively advantageous in case of changing environments. On the other hand, the Metzger and colleagues found the signature of selection for reduced noise in natural populations of *Saccharomyces cerevisiae*. Together, these results provide additional evidence that the amount of stochasticity in the expression of every single gene has an optimum, with higher values being less advantageous because of noise propagation in the network the gene belongs to and lower values being suboptimal in case of changing environment because of less phenotypic plasticity.

Conclusion

Using a new measure of transcriptional noise, our results demonstrate that the position of the protein in the interactome is a major driver of selection against stochastic gene expression. As such, transcriptional noise is an essential component of the phenotype, in addition to the mean expression level and the actual sequence and structure of the encoded proteins. This is currently an under-appreciated phenomenon, and gene expression studies that focus only on the mean expression of genes may be missing key information about expression diversity. The study of gene expression must consider changes in noise in addition to change in mean expression level as a putative explanation for adaptation. Further work aiming to unravel the exact structure of the regulome is however needed in order to fully understand how transcriptional noise is generated or inhibited.

## 602 **Acknowledgements**

603 The authors would like to thank Rafiq Neme-Garrido, Frederic Bartels and Estelle Renaud for  
604 fruitful discussions about this work, as well as Diethard Tautz for comments on an earlier version of  
605 this manuscript. JYD acknowledges funding from the Max Planck Society. This work was  
606 supported by the German Research Foundation (DFG), within the priority program (SPP) 1590.

607

## 608 **References**

- Alexa A, Rahnenführer J, Lengauer T. 2006. Improved scoring of functional groups from gene expression data by decorrelating GO graph structure. *Bioinformatics* 22:1600–1607.
- Arkin A, Ross J, Mcadams HH. 1998. Stochastic Kinetic Analysis of Developmental Pathway Bifurcation in Phage L-Infected Escherichia coli Cells. *Genetics* 149:1633–1648.
- Barabási A-L, Albert R. 1999. Emergence of Scaling in Random Networks. *Science* 286:509–513.
- Barabási A-L, Oltvai ZN. 2004. Network biology: understanding the cell's functional organization. *Nature reviews. Genetics* 5:101–113.
- Bar-even A, Paulsson J, Maheshri N, Carmi M, Shea EO, Pilpel Y, Barkai N. 2006. Noise in protein expression scales with natural protein abundance. *Nature genetics* 38:636–643.
- Barkai N, Leibler S. 1999. Circadian clocks limited by noise. *Nature* 403:267–268.
- Becskei A, Kaufmann BB, van Oudenaarden A. 2005. Contributions of low molecule number and chromosomal positioning to stochastic gene expression. *Nature Genetics* 37:937–944.
- Becskei A, Serrano L. 2000. Engineering stability in gene networks by autoregulation. *Nature* 405:590–593.
- Benjamini Y, Hochberg Y. 1995. Controlling the False Discovery Rate: A Practical and Powerful Approach to Multiple Testing. *Journal of the Royal Statistical Society* 57:289–300.
- Blake WJ, Kærn M, Cantor CR, Collins JJ. 2003. Noise in eukaryotic gene expression. *Nature* 422:633–637.
- Chubb JR, Trcek T, Shenoy SM, Singer RH. 2006. Transcriptional Pulsing of a Developmental Gene. *Current Biology* 16:1018–1025.
- Croft D, Mundo AF, Haw R, Milacic M, Weiser J, Wu G, Caudy M, Garapati P, Gillespie M, Kamdar MR, et al. 2014. The Reactome pathway knowledgebase. *Nucleic Acids Research* 42:472–477.
- Csardi G, Nepusz T. 2006. The igraph software package for complex network research, *InterJournal, Complex Systems* 1695.

- Dixon JR, Selvaraj S, Yue F, Kim A, Li Y, Shen Y, Hu M, Liu JS, Ren B. 2012. Topological domains in mammalian genomes identified by analysis of chromatin interactions. *Nature* 485:376–380.
- Dray, S, Dufour, AB. 2007. The ade4 package: implementing the duality diagram for ecologists. *Journal of Statistical Software*. 22(4): 1-20.
- Dublanche Y, Michalodimitrakis K, Kümmerer N, Foglierini M, Serrano L. 2006. Noise in transcription negative feedback loops: simulation and experimental analysis. *Molecular systems biology* 2:41–41.
- Eldar A, Elowitz MB. 2010. Functional roles for noise in genetic circuits. *Nature* 467:167–173.
- Elowitz MB, Levine AJ, Siggia ED, Swain PS. 2002. Stochastic Gene Expression in a Single Cell. *Science* 297:1183–1186.
- Fraser HB, Hirsh AE, Giaever G, Kumm J, Eisen MB. 2004. Noise Minimization in Eukaryotic Gene Expression. *PLoS Biology* 2:0834–0838.
- Fraser HB, Hirsh AE, Steinmetz LM, Scharfe C, Feldman MW. 2002. Evolutionary Rate in the Protein Interaction Network. *Science* 296:750–752.
- Gillespie DT. 1977. Exact Simulation of Coupled Chemical Reactions. *The Journal of Physical Chemistry* 81:2340–2361.
- Grossmann S, Bauer S, Robinson PN, Vingron M. 2007. Improved detection of overrepresentation of Gene-Ontology annotations with parent – child analysis. *Bioinformatics* 23:3024–3031.
- Guimera R, Amaral LAN. 2005. Functional cartography of complex metabolic networks. *Nature* 433:895–900.
- Hahn MW, Conant GC, Wagner A. 2004. Molecular Evolution in Large Genetic Networks: Does Connectivity Equal Constraint? *Journal of Molecular Evolution* 58:203–211.
- Hahn MW, Kern AD. 2004. Comparative Genomics of Centrality and Essentiality in Three Eukaryotic Protein-Interaction Networks. *Molecular Biology and Evolution* 22:7–10.
- Harrell Jr, FE. 2016. rms: Regression Modeling Strategies. R package version 4.5-0.
- Hartwell LH, Hopfield JJ, Leibler S, Murray AW. 1999. From molecular to modular cell biology. *Nature* 402:C47–C52.
- Hebenstreit D. 2013. Are gene loops the cause of transcriptional noise? *Trends in Genetics* 29:333–338.
- Hirsh A, Fraser H. 2001. Protein dispensability and rate of evolution. *Nature* 411:1046–1049.
- Jacob F. 1977. Evolution and Tinkering. *Science* 196:1161–1166.
- Jeong H, Mason SP, Barabási a L, Oltvai ZN. 2001. Lethality and centrality in protein networks. *Nature* 411:41–42.
- Jeong H, Tombor B, Albert R, Oltvai ZN, Barabási A-L. 2000. The large-scale organization of metabolic networks. *Nature* 407:651–654.

- Jovelin R, Phillips PC. 2009. Evolutionary rates and centrality in the yeast gene regulatory network. *Genome biology* 10:R35–R35.
- Joy MP, Brock A, Ingber DE, Huang S. 2005. High-betweenness proteins in the yeast protein interaction network. *Journal of Biomedicine and Biotechnology* 2005:96–103.
- Kaufmann BB, van Oudenaarden A. 2007. Stochastic gene expression: from single molecules to the proteome. *Current opinion in genetics & development* 17:107–112.
- Kepler TB, Elston TC. 2001. Stochasticity in Transcriptional Regulation : Origins, Consequences, and Mathematical Representations. *Biophysical Journal* 81:3116–3136.
- Kim PM, Lu LJ, Xia Y, Gerstein MB. 2013. Relating Three-Dimensional Structures to Protein Networks Provides Evolutionary Insights. *Science* 603:1938–1941.
- Koenker, R. 2016. quantreg: Quantile Regression. R package version 5.29.
- Lehner B. 2008. Selection to minimise noise in living systems and its implications for the evolution of gene expression. *Molecular systems biology* 4:170–170.
- Luo, W, Brouwer C. 2013. Pathview: an R/Bioconductor package for pathway-based data integration and visualization. *Bioinformatics*, 29(14): 1830-1831.
- Maslov S, Sneppen K. 2002. Specificity and Stability in Topology of Protein Networks. *Science* 296:910–913.
- Mcadams HH, Arkin A. 1997. Stochastic mechanisms in gene expression. *Proceedings of the National Academy of Sciences of the United States of America* 94:814–819.
- Metzger BPH, Yuan DC, Gruber JD, Duveau F, Wittkopp PJ. 2015. Selection on noise constrains variation in a eukaryotic promoter. *Nature* 521:344–347.
- Milborrow, S. 2016 Derived from mda:mars by Trevor Hastie and Rob Tibshirani. Uses Alan Miller's Fortran utilities with Thomas Lumley's leaps wrapper. earth: Multivariate Adaptive Regression Splines. R package version 4.4.7.
- Neme R, Tautz D. 2013. Phylogenetic patterns of emergence of new genes support a model of frequent de novo evolution. *BMC genomics* 14:117–117.
- Newman JRS, Ghaemmaghami S, Ihmels J, Breslow DK, Noble M, Derisi JL, Weissman JS. 2006. Single-cell proteomic analysis of *S. cerevisiae* reveals the architecture of biological noise. *Nature* 441:840–846.
- Newmann MEJ. 2003. The structure and function of complex networks. *SIAM Review* 45:167–256.
- Norman TM, Lord ND, Paulsson J, Losick R. 2015. Stochastic Switching of Cell Fate in Microbes. *Annual review of microbiology* 69:381–403.
- Ozbudak EM, Thattai M, Kurtser I, Grossman AD, Oudenaarden AV. 2002. Regulation of noise in the expression of a single gene. *Nature genetics* 31:69–73.
- Pál C, Papp B, Hurst LD. 2001. Highly Expressed Genes in Yeast Evolve Slowly. *Genetics* 158:927–931.

- Pedraza JM, van Oudenaarden A. 2005. Noise propagation in gene networks. *Science* 307:1965–1969.
- Pinheiro J, Bates D, DebRoy S, Sarkar D, R Core Team. 2017. *\_nlme: Linear and Nonlinear Mixed Effects Models\_*. R package version 3.1-129.
- Pombo A, Dillon N. 2015. Three-dimensional genome architecture: players and mechanisms. *Nature Reviews Molecular Cell Biology* 16:245–257.
- Pozhitkov, Alex E., Tautz D, Noble, Peter A. 2007. Oligonucleotide microarrays: widely applied poorly understood. *Briefings in Functional Genomics and Proteomics*. 6:141–148.
- Raj A, Oudenaarden AV. 2008. Review Nature , Nurture , or Chance : Stochastic Gene Expression and Its Consequences. *Cell* 135:216–226.
- Raj A, Peskin CS, Tranchina D, Vargas DY, Tyagi S. 2006. Stochastic mRNA Synthesis in Mammalian Cells. *PLoS Biology* 4:e309–e309.
- Raser JM, O’Shea EK. 2005. Noise in Gene Expression: Origins, Consequences, and Control. *Science* 309.
- Sales, G, Calura, E, Romualdi, C. 2016. *graphite: GRAPH Interaction from pathway Topological Environment*. R package version 1.20.1.
- Sánchez A, Kondev J. 2008. Transcriptional control of noise in gene expression. *Proceedings of the National Academy of Sciences of the United States of America* 105:5081–5086.
- Sasagawa Y, Nikaido I, Hayashi T, Danno H, Uno KD, Imai T, Ueda HR. 2013. Quartz-Seq : a highly reproducible and sensitive single-cell RNA sequencing method , reveals non- genetic gene-expression heterogeneity. *Genome Biology* 14:R31–R31.
- Sauer U, Heineman M, Zamboni N. 2007. Getting Closer to the Whole Picture. *Science* 316:550–551.
- Shahrezaei V, Swain PS. 2008. The stochastic nature of biochemical networks. *Curr. Opin. Biotechnol.* 19:369–374.
- Shalek AK, Satija R, Adiconis X, Gertner RS, Gaublomme JT, Raychowdhury R, Schwartz S, Yosef N, Malboeuf C, Lu D, et al. 2013. Single-cell transcriptomics reveals bimodality in expression and splicing in immune cells. *Nature* 498:236–240.
- Shalek AK, Satija R, Shuga J, Trombetta JJ, Gennert D, Lu D, Chen P, Gertner RS, Gaublomme JT, Yosef N, et al. 2014. Single-cell RNA-seq reveals dynamic paracrine control of cellular variation. *Nature* 510:363–369.
- Sharon E, Van Dijk D, Kalma Y, Keren L, Manor O, Yakhini Z, Segal E. 2014. Probing the effect of promoters on noise in gene expression using thousands of designed sequences. *Genome Research* 24:1698–1706.
- So L, Ghosh A, Zong C, Sepúlveda LA, Segev R, Golding I. 2011. General properties of transcriptional time series in *Escherichia coli*. *Nature Genetics* 43:554–560.
- Spudich JL, Koshland DEJ. 1976. Non-genetic individuality: chance in the single cell. *Nature*:467–471.

- Suter DM, Molina N, Gatfield D, Schneider K, Schibler U, Naef F. 2011. Mammalian Genes Are Transcribed with Widely Different Bursting Kinetics. *Science* 332:472–474.
- Taniguchi Y, Choi PJ, Li G, Chen H, Babu M, Hearn J, Emili A, Xie XS. 2011. Quantifying *E. coli* Proteome and Transcriptome with Single-Molecule Sensitivity in Single Cells. *Science* (New York, N.Y.) 329:533–539.
- Tao Y, Zheng X, Sun Y. 2007. Effect of feedback regulation on stochastic gene expression. *J. Theor. Biol.* 247:827–836.
- Tautz D, Domazet-Lošo T. 2011. The evolutionary origin of orphan genes. *Nature reviews. Genetics* 12:692–702.
- Thattai M, Oudenaarden AV. 2001. Intrinsic noise in gene regulatory networks. *Proceedings of the National Academy of Sciences of the United States of America* 98:8614–8619.
- Thattai M, Oudenaarden AV. 2004. Stochastic Gene Expression in Fluctuating Environments. *Genetics* 167:523–530.
- Venables, W N, Ripley, B D. 2002. *Modern Applied Statistics with S*. Fourth Edition. Springer, New York.
- Vitkup D, Kharchenko P, Wagner A. 2006. Influence of metabolic network structure and function on enzyme evolution. *Genome biology* 7:R39–R39.
- Vu TN, Wills QF, Kalari KR, Niu N, Wang L, Rantalainen M, Pawitan Y. 2016. Beta-Poisson model for single-cell RNA-seq data analyses. *Bioinformatics*:1–8.
- Wang Z, Zhang J. 2011. Impact of gene expression noise on organismal fitness and the efficacy of natural selection. *Proceedings of the National Academy of Sciences* 108:E67–E76.
- Wolf L, Silander OK, van Nimwegen EJ. 2015. Expression noise facilitates the evolution of gene regulation. *eLife* 4:1–48.
- Wolf YI, Novichkov PS, Karev GP, Koonin EV, Lipman DJ. 2009. The universal distribution of evolutionary rates of genes and distinct characteristics of eukaryotic genes of different apparent ages. *Proceedings of the National Academy of Sciences of the United States of America* 106:7273–7280.
- Xie C, Zhang YE, Chen JY, Liu CJ, Zhou WZ, Li Y, Zhang M, Zhang R, Wei L, Li CY. 2012. Hominoid-Specific De Novo Protein-Coding Genes Originating from Long Non-Coding RNAs. *PLoS Genetics* 8:e1002942.-e1002942.
- Yu G, He, Q. 2016 ReactomePA: an R/Bioconductor package for reactome pathway analysis and visualization. *Molecular BioSystems* 12(2):477-479.
- Yu H, Kim PM, Sprecher E, Trifonov V, Gerstein M. 2007. The importance of bottlenecks in protein networks: Correlation with gene essentiality and expression dynamics. *PLoS Computational Biology* 3:713–720.

609 **Tables**

610

611 Table 1: GO terms significantly enriched in the 10% genes with lowest transcriptional noise.

| <b>Ontology</b> | <b>GO ID</b> | <b>GO term</b>                     | <b>FDR Fisher<br/>"parent-child"</b> | <b>FDR Fisher<br/>"weight01"</b> |
|-----------------|--------------|------------------------------------|--------------------------------------|----------------------------------|
| MF              | GO:0003676   | nucleic acid binding               | 2.406E-03                            | 1.475E-08                        |
| MF              | GO:0003735   | structural constituent of ribosome | 6.099E-03                            | 1.708E-05                        |
| BP              | GO:0006334   | nucleosome assembly                | 3.816E-03                            | 1.380E-02                        |
| BP              | GO:0002227   | innate immune response in mucosa   | 6.727E-03                            | 2.018E-02                        |
| BP              | GO:0006412   | translation                        | 1.257E-02                            | 1.380E-02                        |
| 612 CC          | GO:0000788   | nuclear nucleosome                 | 3.493E-05                            | 2.587E-05                        |

613 Note: FDR: False Discovery Rate. MF: Molecular Function. BP: Biological Process. CC: Cellular

614 Compartment.

615

616 Table 2: Correlation of transcriptional noise with genes centrality measures and pleiotropy.

| <b>Measure</b>  | <b>Correlation with F*</b> | <b>p-value</b> |
|-----------------|----------------------------|----------------|
| Degree          | -0.071                     | 6.271E-11      |
| Hub score       | -0.073                     | 1.474E-11      |
| Authority score | -0.068                     | 3.652E-10      |
| Closeness       | -0.005                     | 6.633E-01      |
| Betweenness     | -0.014                     | 2.061E-01      |
| 617 Pleiotropy  | -0.049                     | 1.149E-05      |

618 Note: All correlations are computed using Kendall's rank correlation test.

619 Table 3: Correlation of average transcriptional noise with pathway centrality measures.

| Measure                 | Correlation with average F* | p-value   |
|-------------------------|-----------------------------|-----------|
| Size                    | -0.059                      | 1.376E-03 |
| Diameter                | 0.012                       | 5.366E-01 |
| Average degree          | -0.172                      | 8.944E-21 |
| Average hub score       | -0.188                      | 1.724E-24 |
| Average authority score | -0.166                      | 2.487E-19 |
| Average closeness       | 0.050                       | 6.500E-03 |
| Average betweenness     | -0.166                      | 2.487E-19 |
| 620 Average pleiotropy  | -0.137                      | 1.276E-13 |

621 Note: All correlations are computed using Kendall's rank correlation test.

622

623 Table 4: Linear models with F\* as the independent variable and SynthNet, gene age and Ka/Ks ratio

624 as explanatory variables.

| Effect          | Estimate            | P-value      | Estimate               | P-value     |
|-----------------|---------------------|--------------|------------------------|-------------|
|                 | OLS                 |              | OLS + robust estimates |             |
| SynthNet1       | -0.051315           | 8.06E-16 *** | -0.0513                | <0.0001 *** |
| Age             | -0.028263           | 7.97E-05 *** | -0.0283                | <0.0001 *** |
| Ka/Ks           | -0.340854           | 0.474 NS     | -0.3409                | 0.4523      |
| Age : Ka/Ks     | 0.040627            | 0.131 NS     | 0.0406                 | 0.1164      |
|                 | Quantile regression |              | GLS                    |             |
| SynthNet1       | -0.04359            | <0.00001 *** | -0.0511684             | <0.0001 *** |
| Age             | -0.02616            | 0.01016 *    | -0.0283132             | 0.0001 ***  |
| Ka/Ks           | -0.18344            | 0.75452 NS   | -0.3370668             | 0.4789 NS   |
| 625 Age : Ka/Ks | 0.03638             | 0.27612 NS   | 0.0404483              | 0.1330 NS   |

626 Note: OLS: Ordinary Least Squares. GLS: Generalized Least Squares.



## 627 **Figures**

628 Figure 1: A systemic view of gene expression.

629 Figure 2: Transcriptional noise and mean gene expression. A) Measures of noise plotted against the  
630 mean gene expression for each gene, in logarithmic scales together with corresponding regression  
631 lines: variance, Fano factor (variance / mean), noise (square of the coefficient of variation,  
632 variance / mean<sup>2</sup>) and F\* (this study). B) Distribution of F\* over all genes in this study. Vertical  
633 line corresponds to F\* = 1.

634 Figure 3: Impact of genome organization on the distribution of transcriptional noise. The x-axis  
635 shows the mean relative difference in transcriptional noise. Vertical lines show observed values and  
636 histograms the distribution over 1,000 permutations (see Methods). Left panel: distribution for  
637 neighbor genes along the genome. Right panel: distribution for genes in contact in three-  
638 dimensions.

639 Figure 4: Enriched pathways in the 10% genes with lowest transcriptional noise.

640 Figure 5: Correlation of network measures. A) Correlation circle of network centrality measures. B)  
641 Proportion of total inertia explained by each principal component (bars) and cumulative proportion  
642 of inertia explained (lines).

643 Figure 6: Assortativity in networks. For the 101 pathways for which data was available, assortativity  
644 for F\* and hub score were plotted against each other. Orange line: simple linear model. Blue line:  
645 “breakpoint” model. Vertical dashed line show the minimal value of hub score assortativity from  
646 which it has no effect on F\* assortativity.

647 Figure 7: Correlation of F\* with synthetic centrality measure, gene age and Ka / Ks ratio.

648

649 Sup mat:

650 Table S1: Correlation analyses with Shalek (2013) data set.

651

652 Table S2: Correlation analyses with pooled RNA-Seq data.

# Figure 1

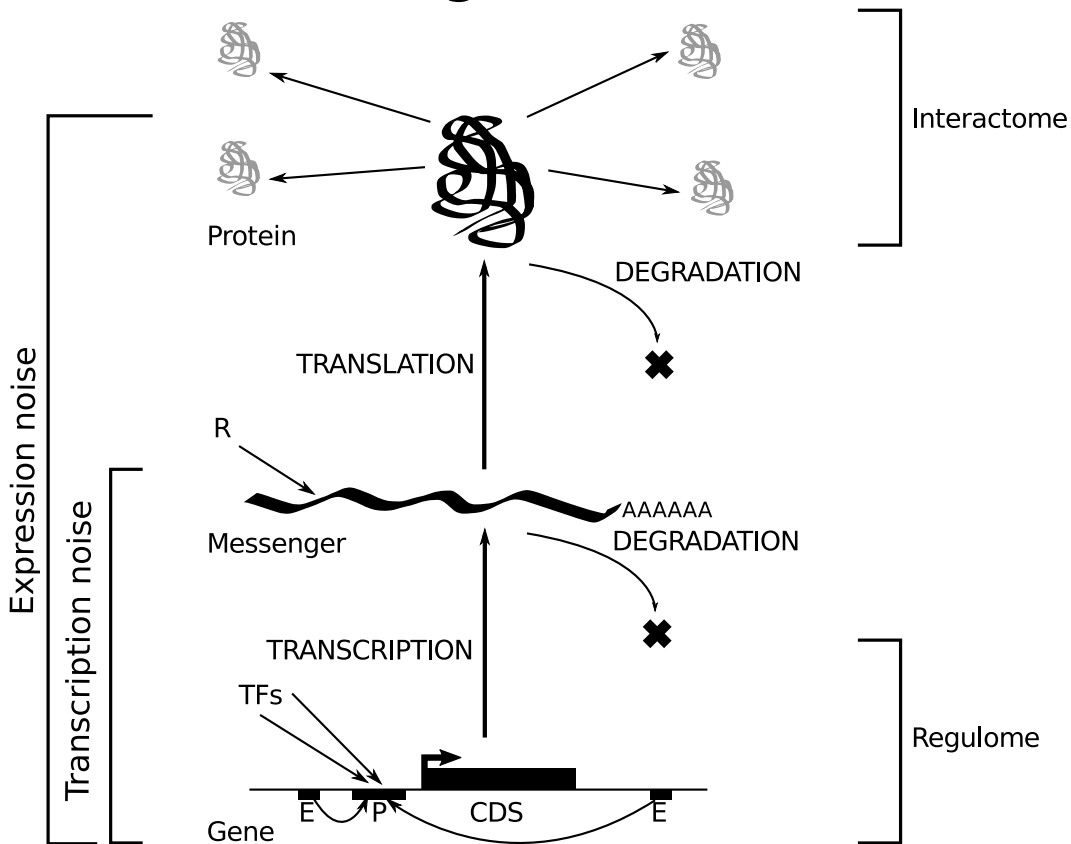

## Figure 2

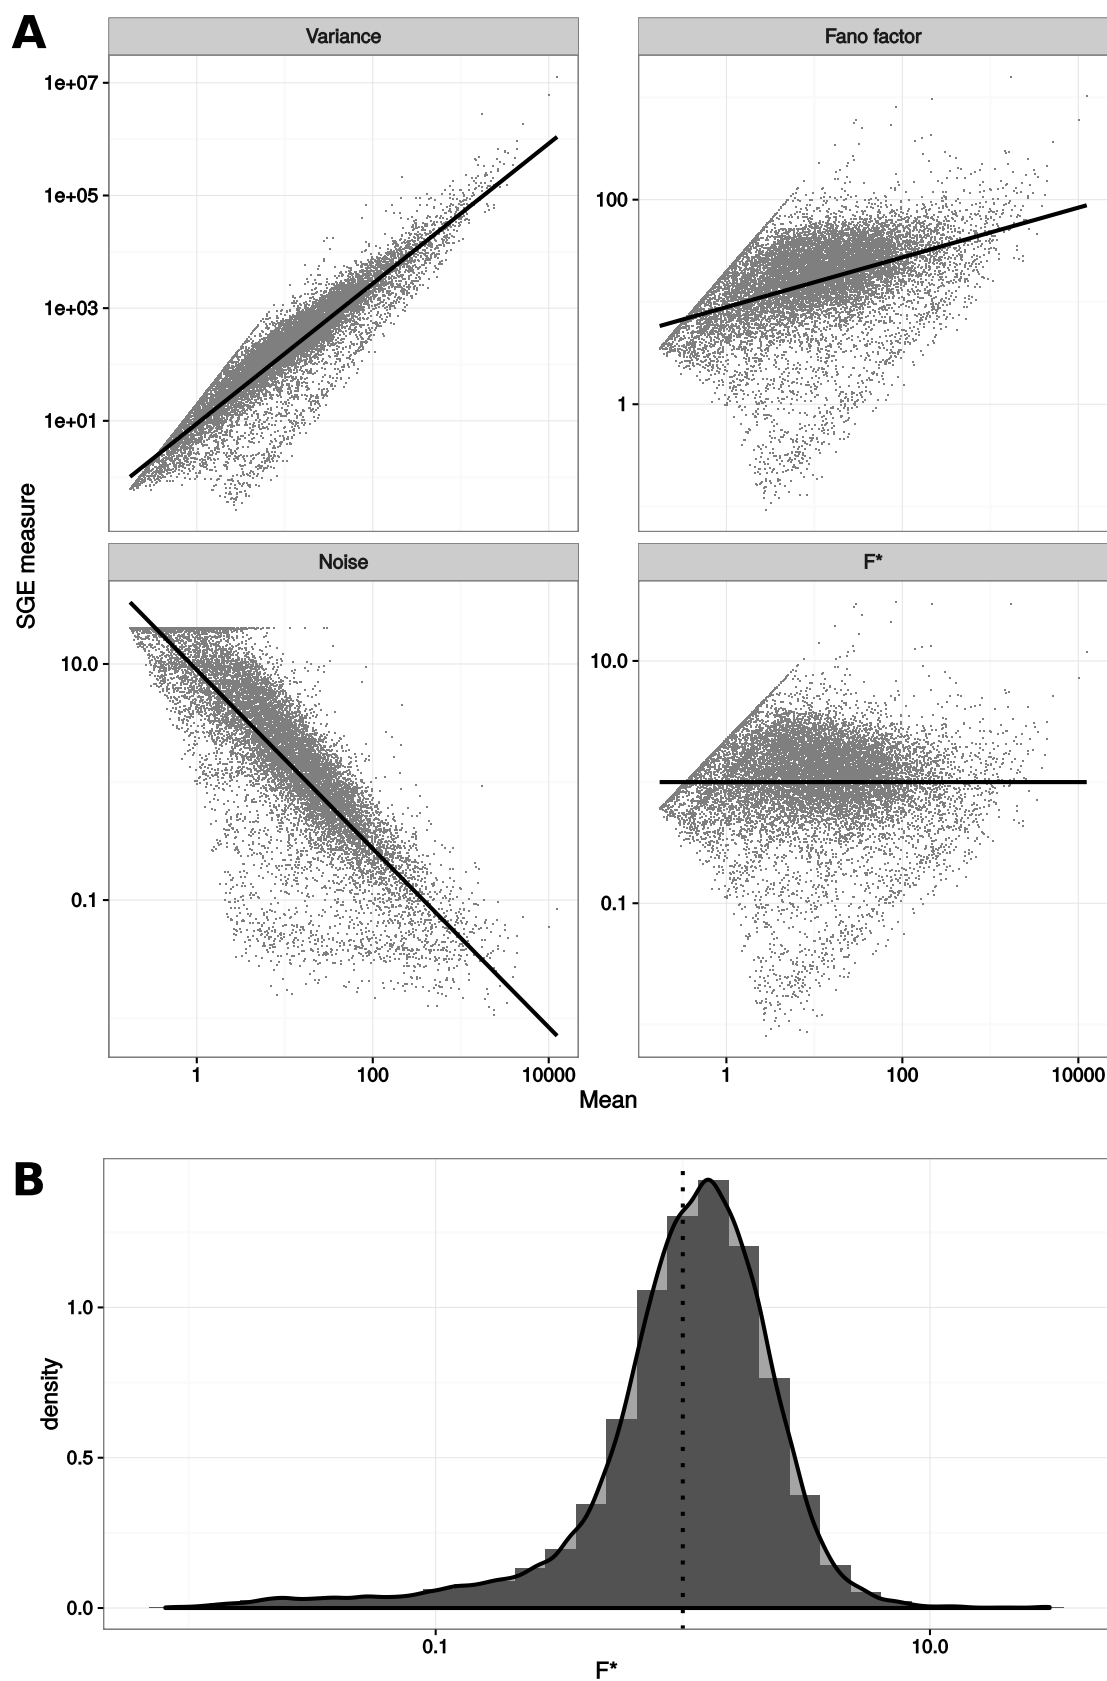

# Figure 3

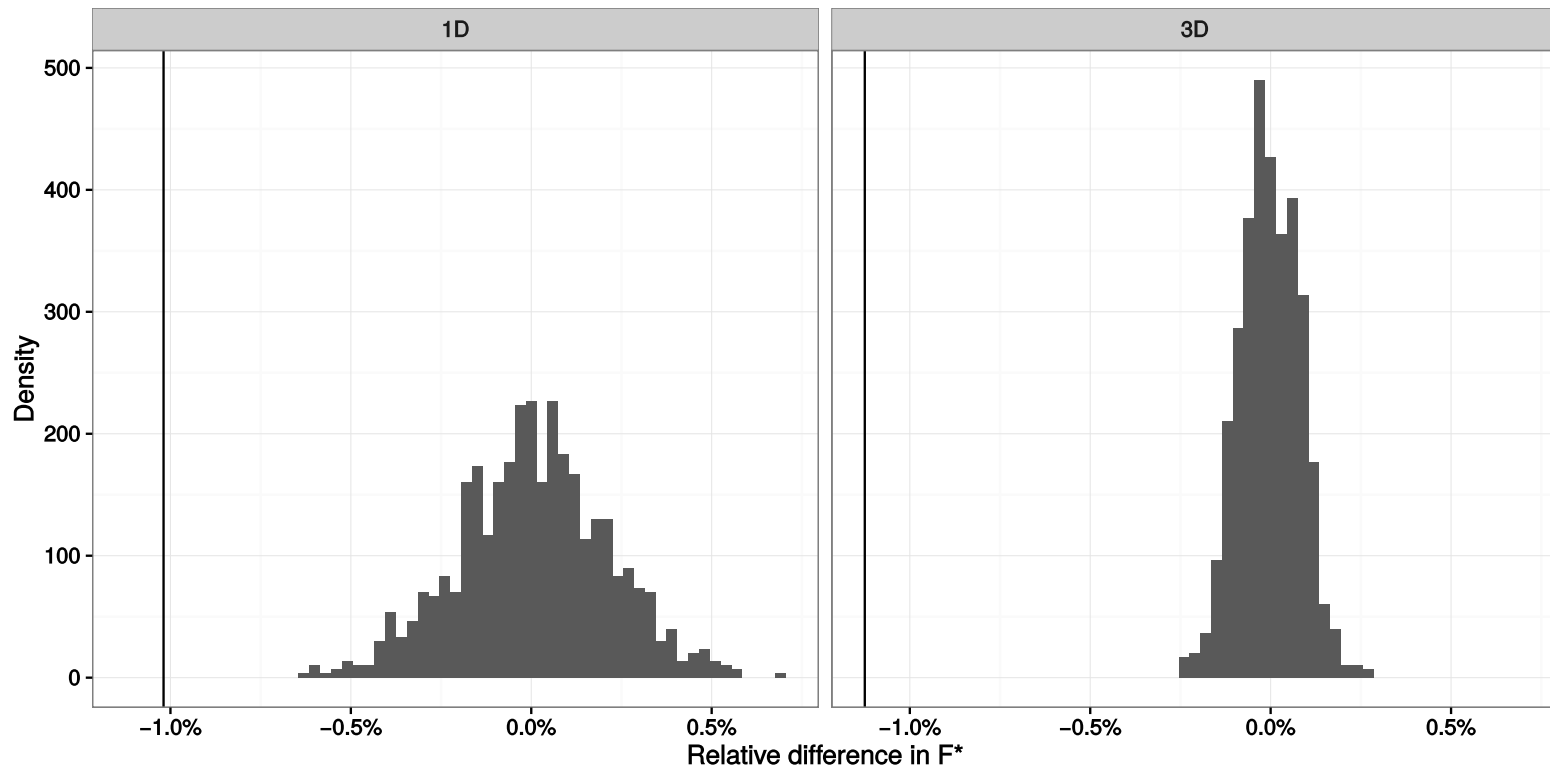

# Figure 4

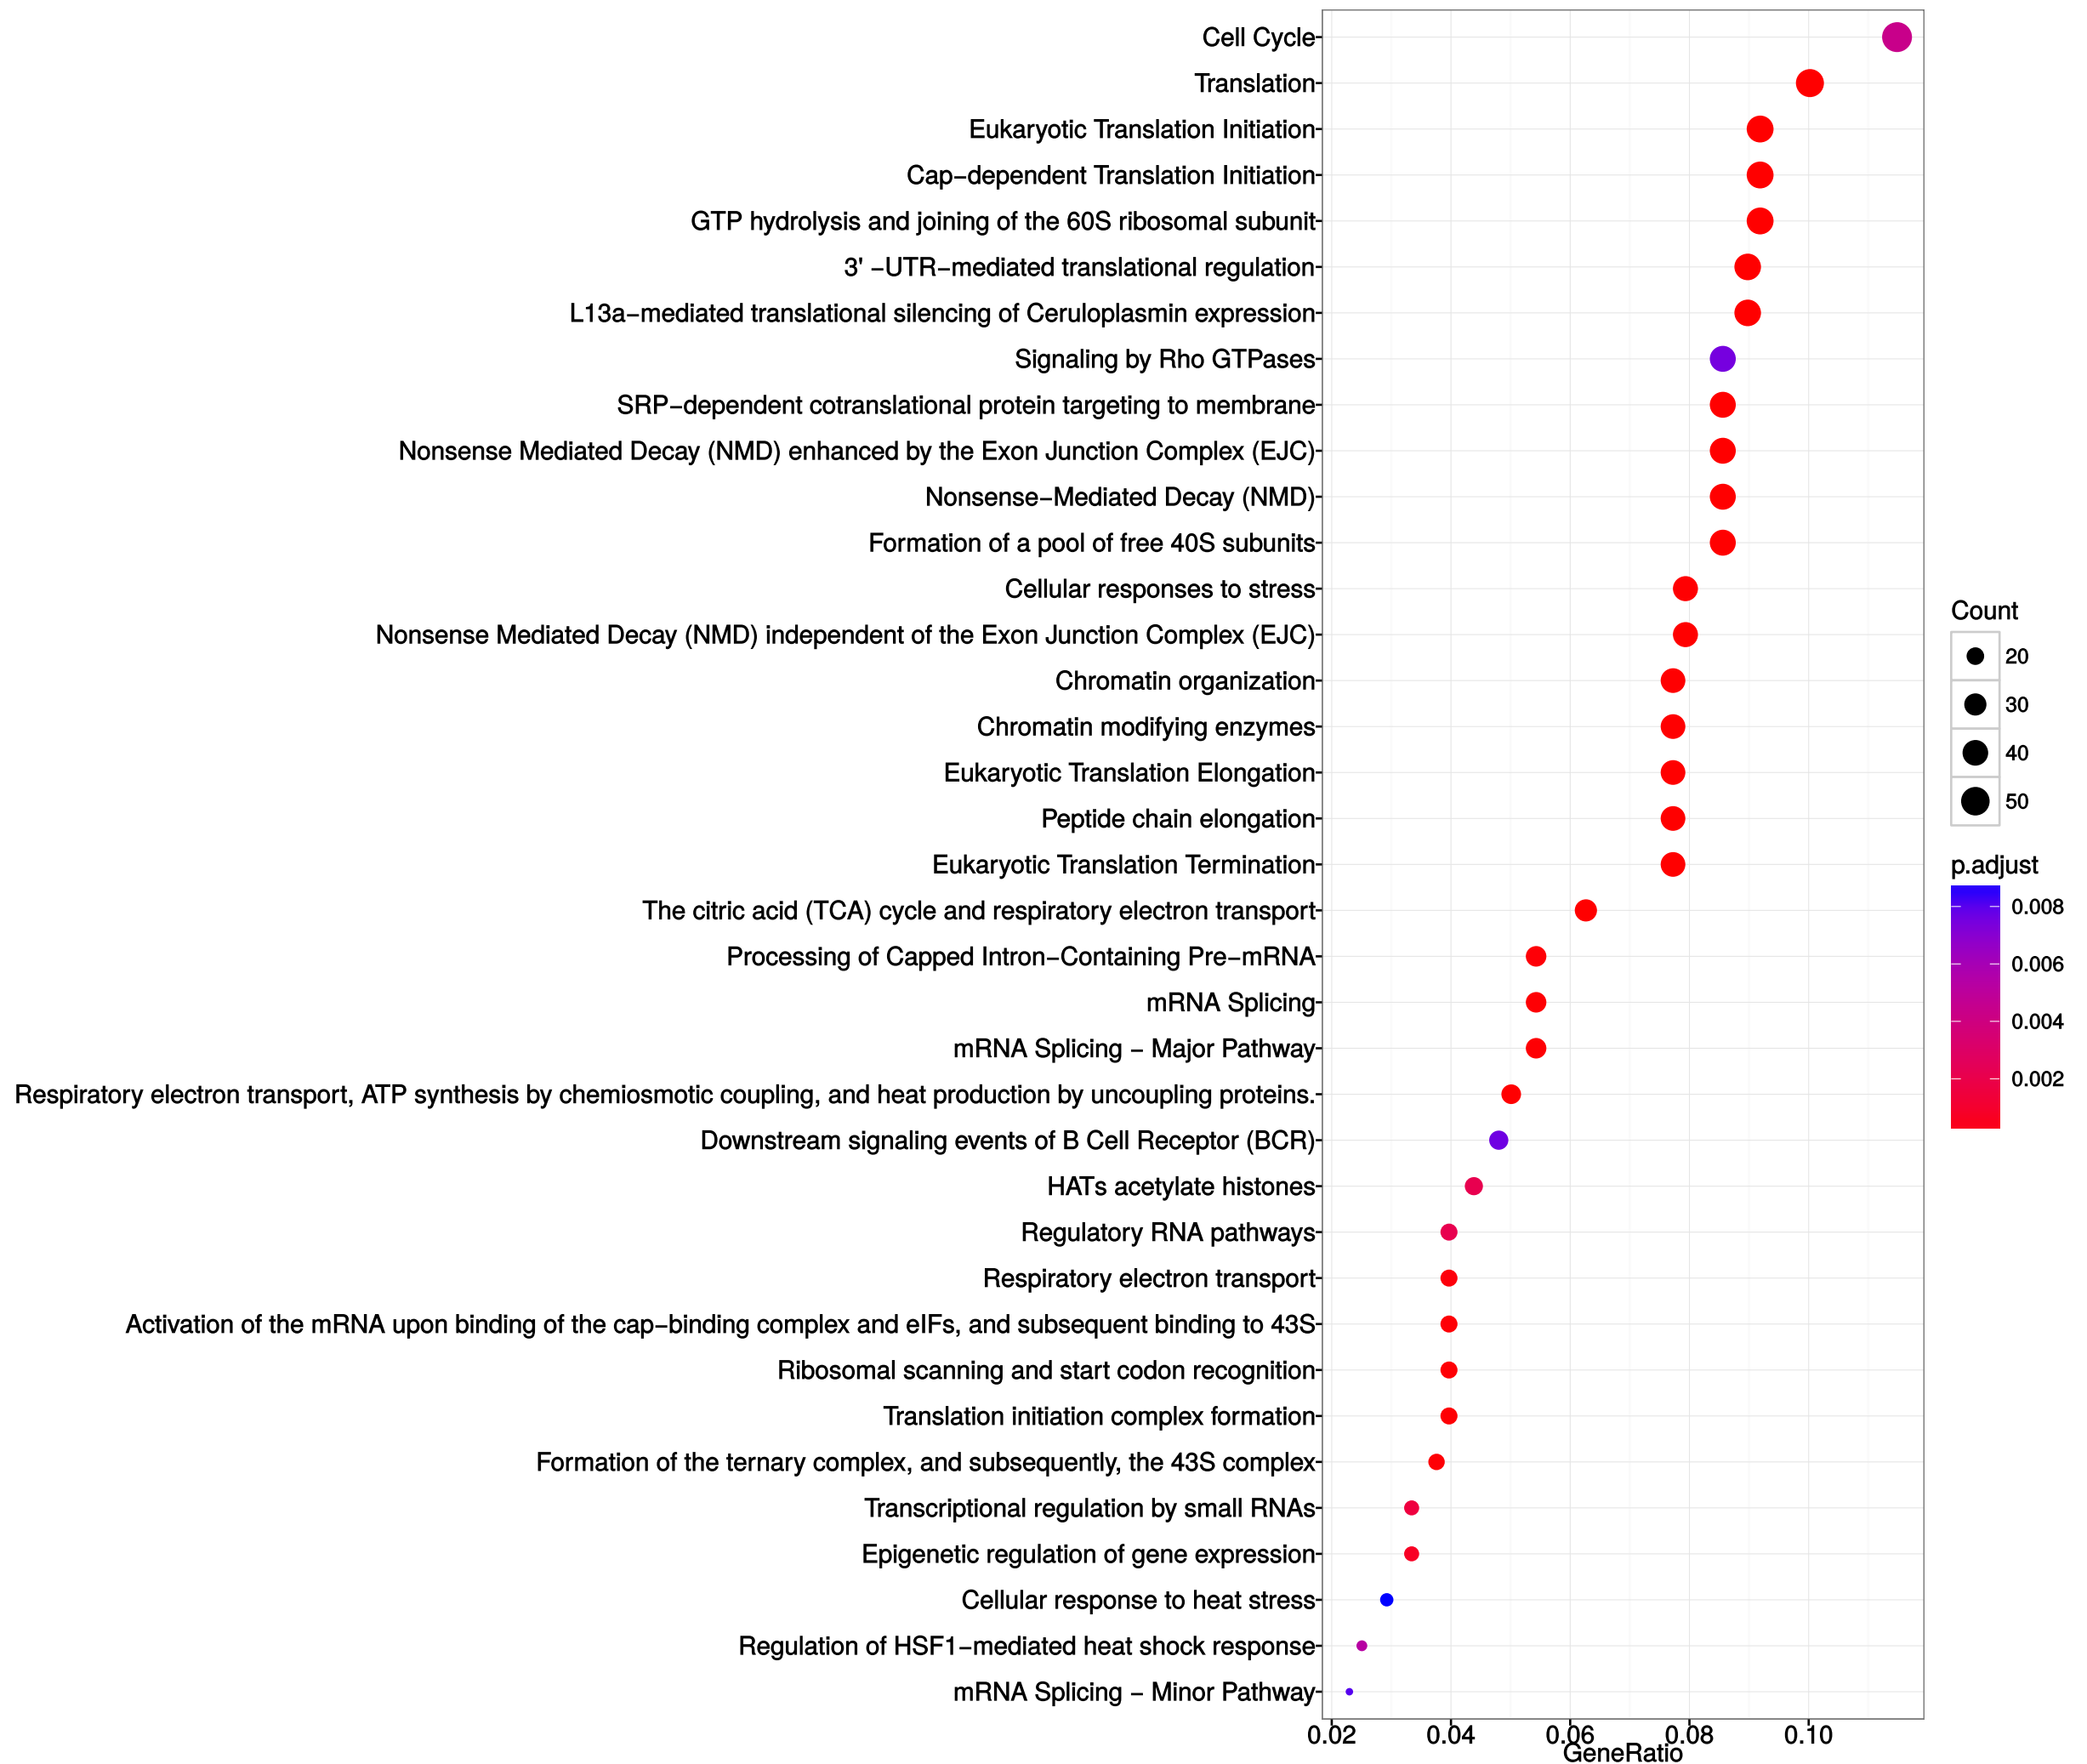

# Figure 5

## A

bioRxiv preprint doi: <https://doi.org/10.1101/104216>; this version posted January 30, 2017. The copyright holder for this preprint (which was not certified by peer review) is the author/funder, who has granted bioRxiv a license to display the preprint in perpetuity. It is made available under aCC-BY-NC-ND 4.0 International license.

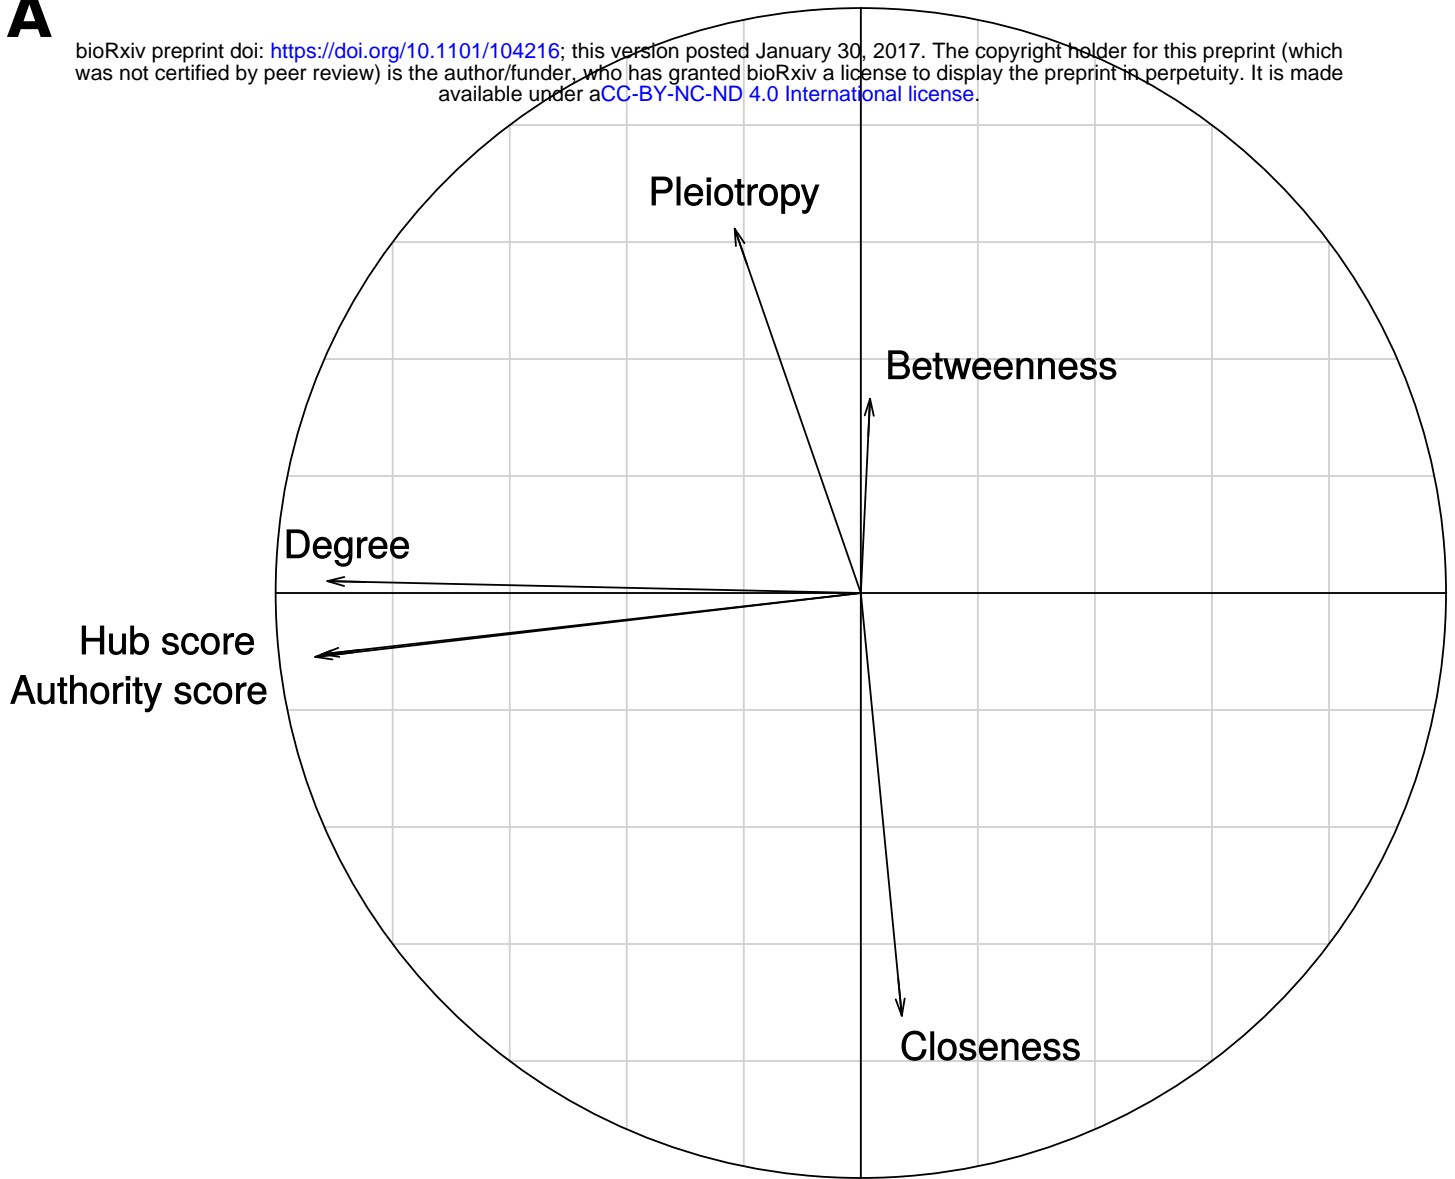

## B

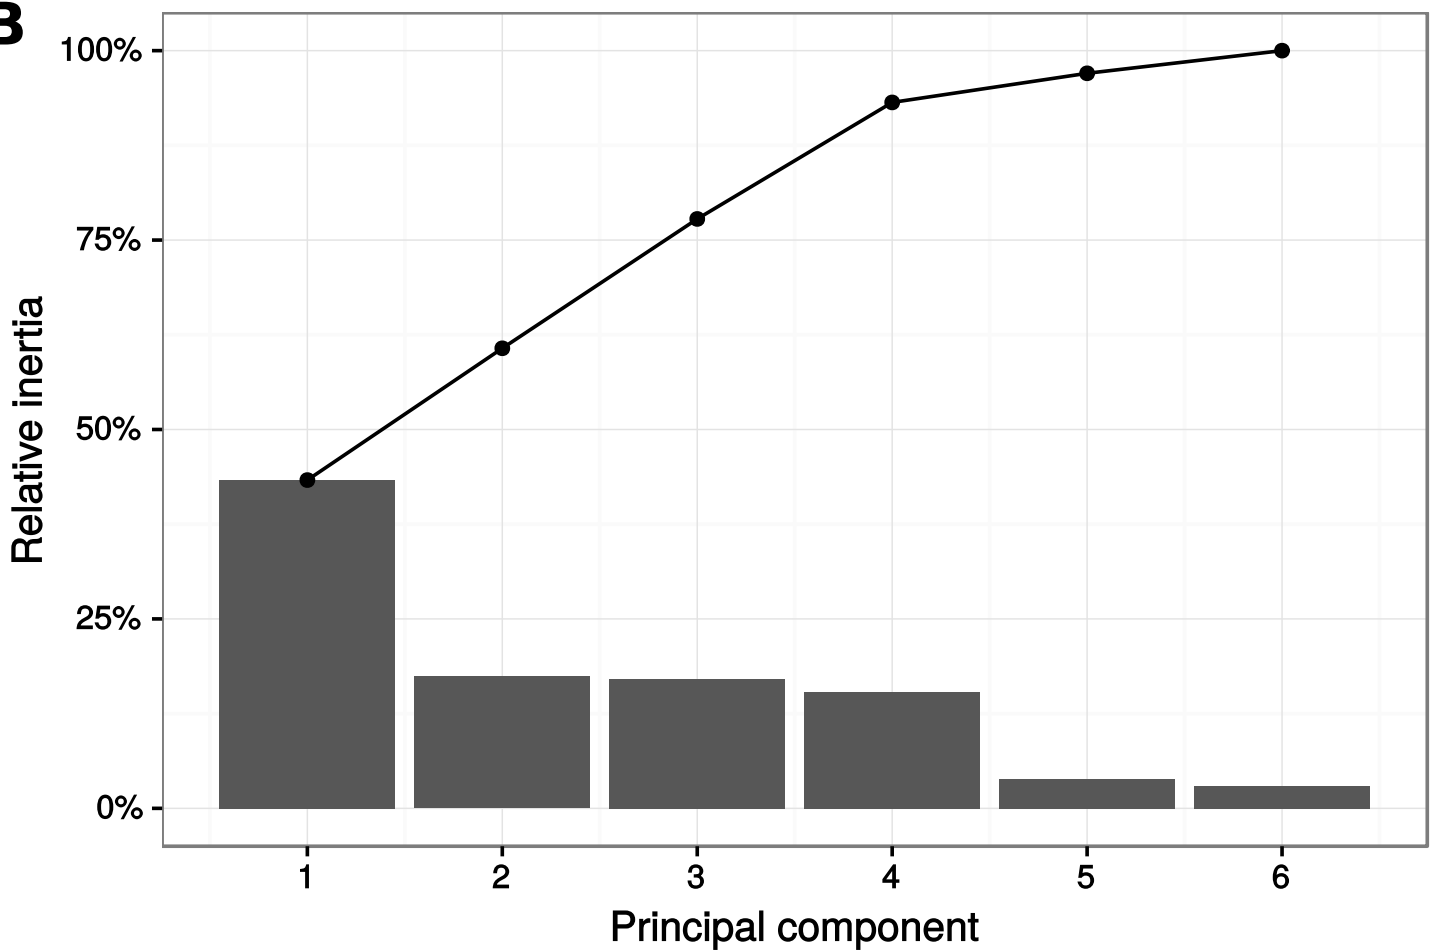

# Figure 6

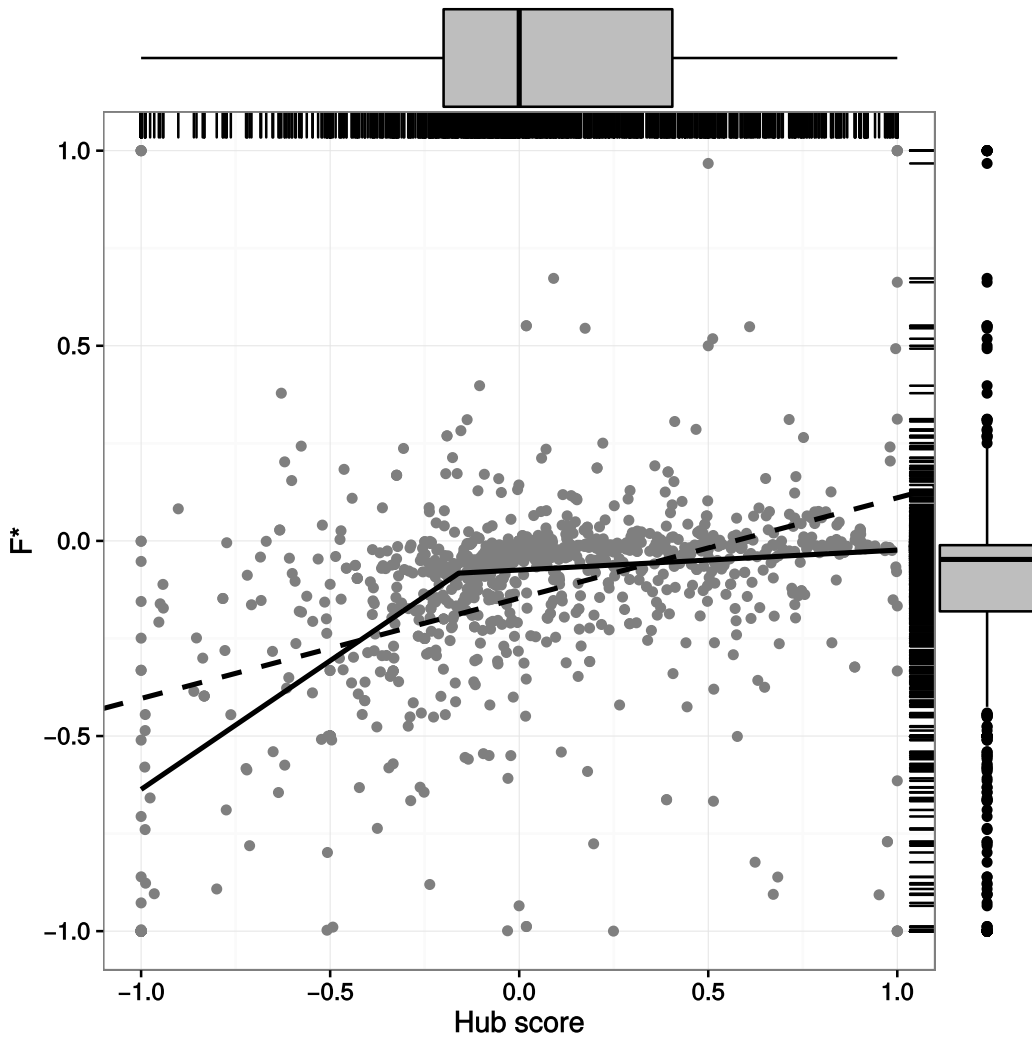



**Figure 7**

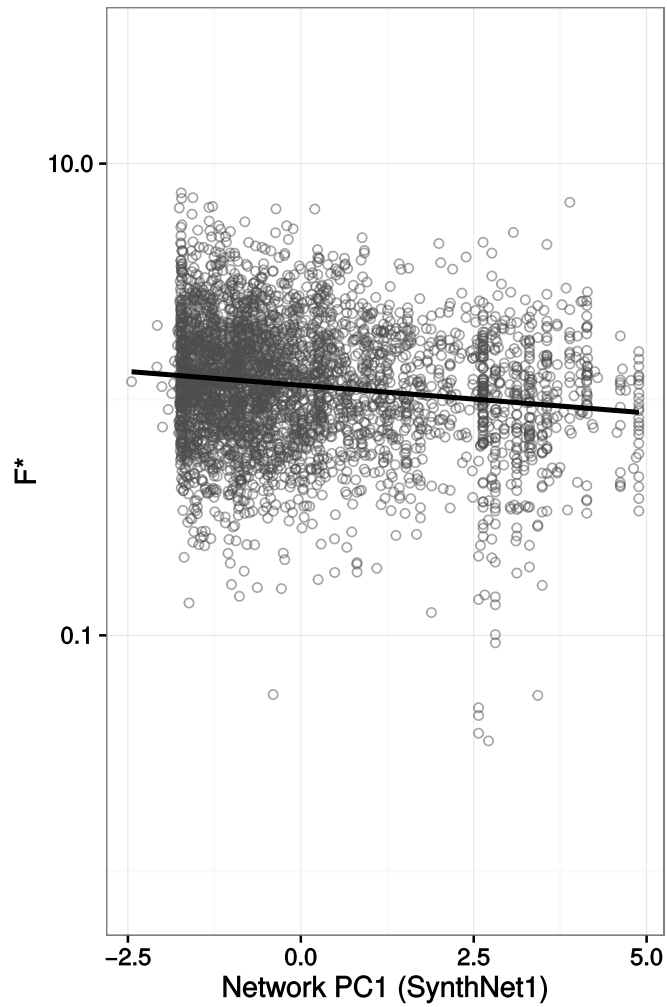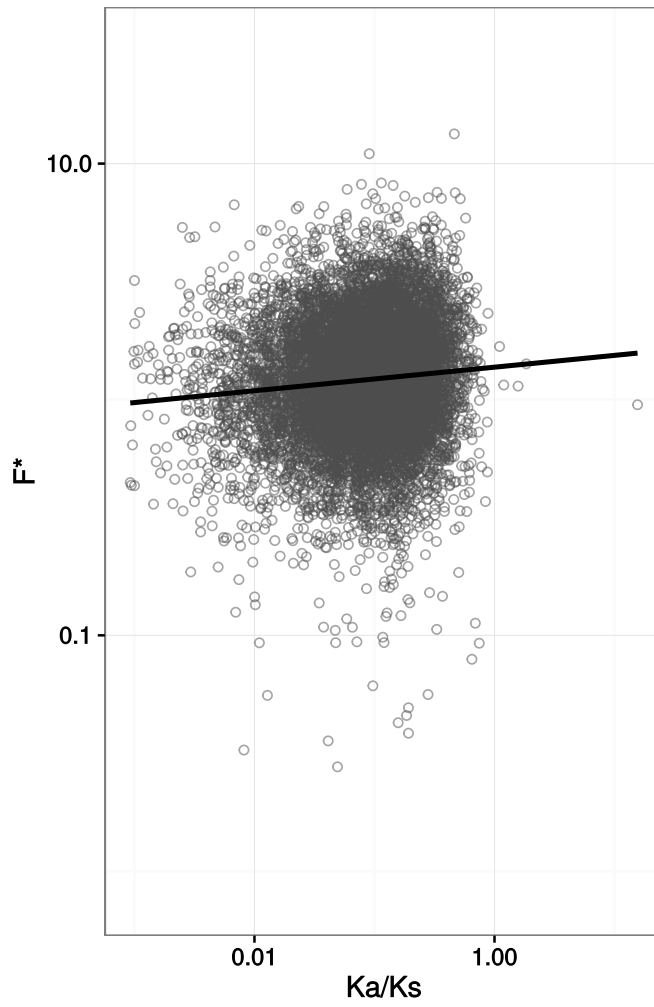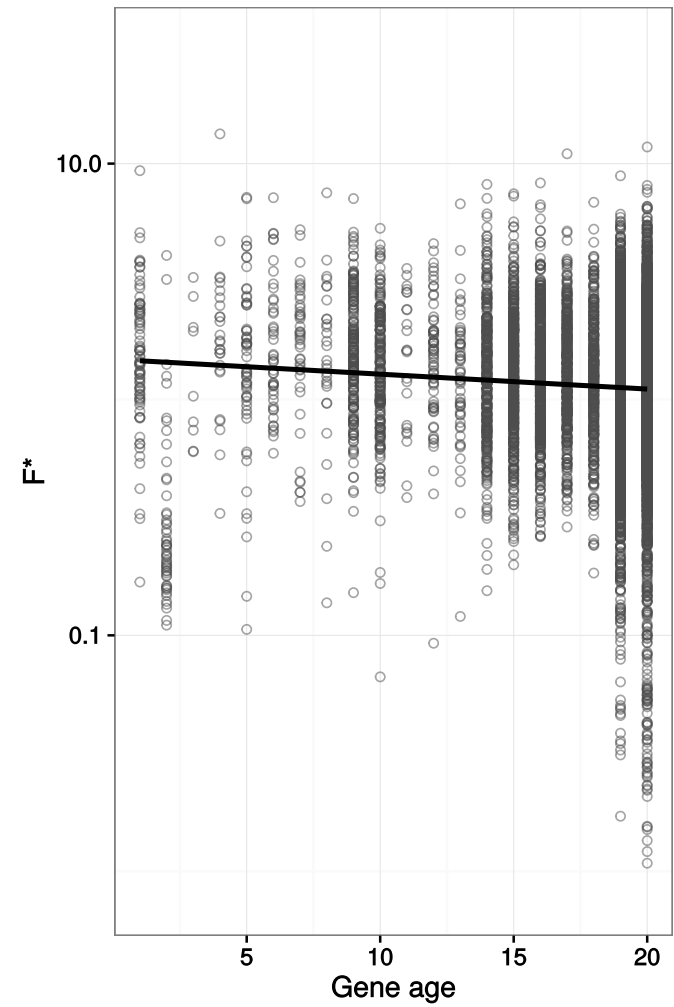

Source: http://www.biorxiv.org/content/10.1101/104216v1.full.pdf
